1 A novel retroviral vector system to analyze expression from mRNA with retained introns using  
2 fluorescent proteins and flow cytometry

3

4 Patrick E. H. Jackson<sup>1,2</sup>, Jing Huang<sup>2,3</sup>, Monika Sharma<sup>2,4</sup>, Sara K. Rasmussen<sup>2,4</sup>, Marie-Louise  
5 Hammarskjold<sup>2,3</sup> and David Rekosh<sup>2,3\*</sup>

6

7 <sup>1</sup>Division of Infectious Diseases and International Health, Department of Medicine, University of  
8 Virginia, Charlottesville, Virginia, USA

9 <sup>2</sup>Myles H. Thaler Center for HIV and Human Retrovirus Research, University of Virginia,  
10 Charlottesville, Virginia, USA

11 <sup>3</sup>Department of Microbiology, Immunology and Cancer Biology, University of Virginia,  
12 Charlottesville, Virginia, USA

13 <sup>4</sup>Department of Surgery, University of Virginia, Charlottesville, Virginia, USA

14

15 \*corresponding author

16 Correspondence to: [dr4u@virginia.edu](mailto:dr4u@virginia.edu)

17

18 **Abstract**

19           The ability to overcome cellular restrictions that exist for the export and translation of  
20 mRNAs with retained introns is a requirement for the replication of retroviruses and also for the  
21 expression of many mRNA isoforms transcribed from cellular genes. In some cases, RNA  
22 structures have been identified in the mRNA that directly interact with cellular factors to promote  
23 the export and expression of isoforms with retained introns. In other cases, a viral protein is also  
24 required to act as an adapter. In this report we describe a novel vector system that allows  
25 measurement of the ability of *cis*- and *trans*-acting factors to promote the export and translation  
26 of mRNA with retained introns.

27           One reporter vector used in this system is derived from an HIV proviral clone engineered  
28 to express two different fluorescent proteins from spliced and unspliced transcripts. The ratio of  
29 fluorescent signals is a measurement of the efficiency of export and translation. A second vector  
30 utilizes a third fluorescent protein to measure the expression of viral export proteins that interact  
31 with some of the export elements. Both vectors can be packaged into viral particles and be used  
32 to transduce cells, allowing expression at physiological levels from the integrated vector.

33

## 34 **Introduction.**

35 Intron retention is an important form of alternative splicing that is prevalent during  
36 retroviral replication, and is also found in the regulation of cellular genes. Special mechanisms  
37 have been described that promote the export and translation of mRNAs with retained introns<sup>1</sup>.  
38 Simple retroviruses, such as the Mason-Pfizer monkey virus (MPMV), rely on an RNA element  
39 present in the transcript that retains an intron, which binds to a cellular protein complex  
40 consisting of Nxf1 and the co-factor Nxt1 to promote export and translation<sup>2-4</sup>. This element is  
41 referred to as a constitutive transport element (CTE) due to the lack of requirement for viral  
42 factors. CTEs have also been found in cellular genes, including within intron 10 of *NXF1* where  
43 a CTE functions to export an RNA that is translated into a short form of Nxf1<sup>5-7</sup>.

44 A more complex retrovirus, HIV-1, requires the nucleo-cytoplasmic export of both  
45 unspliced and incompletely spliced viral RNA transcripts for the translation of essential viral  
46 proteins and for the packaging of progeny viral genomes<sup>8,9</sup>. For these mRNAs, export and  
47 translation is dependent on the viral Rev protein<sup>10,11</sup> and an RNA secondary structure called the  
48 Rev Response Element (RRE)<sup>12-14</sup>. Rev binding and multimerization on the RRE permits the  
49 assembly of cellular factors, including Crm1 and Ran-GTP, to form an export-competent  
50 ribonucleoprotein complex<sup>15,16</sup>. In contrast, the completely spliced HIV transcripts can be  
51 exported and translated in the absence of Rev. Other complex retroviruses, such as equine  
52 infectious anemia virus (EIAV) (Rev and RRE)<sup>17</sup>, HTLV (Rex and RexRE)<sup>18</sup>, mouse mammary  
53 tumor virus (Rem and RmRE)<sup>19</sup>, and the youngest family of human endogenous retroviruses,  
54 HERV-K (Rec and RcRE)<sup>20,21</sup>, use an analogous mechanism to accomplish the export and  
55 translation of intron-containing transcripts.

56 HIV is notable for the high degree of sequence diversity exhibited during natural  
57 infection<sup>22</sup> and the Rev-RRE system shows significant variation in functional activity between  
58 different viral isolates from different hosts<sup>23</sup>, and between isolates from the same host at  
59 different time points during infection<sup>24,25</sup>. While the role of Rev-RRE functional activity

60 differences in HIV pathogenesis has not been fully elucidated, there is evidence that it is an  
61 important factor in clinical disease. For example, high RRE activity has been shown to correlate  
62 with an increased rate of decline in CD4 count<sup>26, 27</sup>. Conversely, low Rev activity has been  
63 associated with prolonged survival in the pre-ART era<sup>28</sup> and Rev activity has been correlated  
64 with the sensitivity of HIV infected T-cells to CTL killing<sup>29</sup>. In experimental infection of ponies  
65 with a related virus, EIAV, variation in Rev functional activity was observed during the course of  
66 infection, and functional activity differences correlated with clinical disease state<sup>17, 30</sup>.

67 Variations in the functional activity of the HIV Rev-RRE system have previously been  
68 assessed with subgenomic reporter assays<sup>24, 31, 32</sup> or lentiviral vector packaging assays<sup>23</sup>. Rev-  
69 dependent fluorescent reporter systems have also been developed for use in detecting HIV  
70 infection, but these have not been used to quantify differences in Rev-RRE activity<sup>33</sup>. Existing  
71 functional assays are limited by the multiple steps needed for sample preparation, which often  
72 leads to variation between experiments and low throughput. More importantly, nearly all existing  
73 assay systems have measured Rev-RRE function using transient transfection of non-lymphoid  
74 cell lines.

75 In order to further correlate the variation that is seen in the Rev-RRE system from  
76 different HIV viral isolates with clinical disease states, and to identify additional CTEs present in  
77 cellular genes, we developed a new assay system that quickly allows the functional evaluation  
78 of large numbers of putative export elements and trans-acting factors. The assay utilizes  
79 fluorescent proteins as reporters. A novel aspect of this system is that it uses packageable  
80 retroviral constructs, so that after packaging and transduction of target cells, expression can be  
81 measured from chromosomally integrated proviral sequences. The data in this report  
82 demonstrates the effectiveness of this system in evaluating the expression of mRNA with  
83 retained introns mediated by the HIV Rev-RRE axis, by elements from other viruses, and by  
84 cellular CTEs.

85

86 **Results.**

87

88 *A fluorescence-based high-throughput assay of HIV Rev-RRE functional activity.*

89

90 The HIV provirus is a transcription unit that produces several different mRNA isoforms  
91 from a single promoter. Some of these isoforms are unspliced or incompletely spliced, retaining  
92 one or more introns, and thus require Rev and the RRE for nucleocytoplasmic export and  
93 expression of the proteins they encode. Other isoforms are fully spliced and do not require Rev  
94 and the RRE for expression. An assay system to readily measure the functional activity of the  
95 HIV Rev-RRE axis was designed by altering the full-length HIV proviral construct NL4-3<sup>34</sup> to  
96 express two fluorescent proteins, one in a Rev-dependent fashion and the other in a Rev-  
97 independent fashion (Figure 1). Briefly, the Rev-dependent signal was created by truncating the  
98 *gag* gene, deleting the frameshift signal and inserting an in-frame cassette consisting of a *cis*-  
99 acting hydrolase element (CHYSEL) sequence<sup>35</sup> and the *eGFP* gene. The CHYSEL sequence  
100 is a self-cleaving 2A peptide derived from a picornavirus that induces ribosome skipping at its C-  
101 terminus. This permits the expression of multiple proteins from a single transcript, with the  
102 downstream protein (in this case eGFP) being modified by the inclusion of an additional proline  
103 at the N-terminus. This alteration would be expected to modify the provirus to express a  
104 truncated Gag protein and eGFP from the unspliced Gag-Pol mRNA. As this mRNA contains  
105 two introns, it would require Rev and the RRE for export and translation. The Rev-independent  
106 signal was created by deleting a portion of *nef* and replacing it with either an *mCherry* or  
107 *TagBFP* sequence. Since Nef is made from a fully spliced mRNA that does not require Rev for  
108 export and expression, expression of these proteins would not be expected to require Rev.  
109 Additional modifications were made to the HIV-derived construct to prevent Rev production from  
110 the reporter vector, to further render the construct replication-incompetent, and to permit the  
111 easy exchange of RRE sequences within *env*.

112           Next, we verified that the construct would express TagBFP or mCherry constitutively and  
113 eGFP only in the presence of Rev. Both HIV-derived constructs were transfected individually  
114 into 293T/17 cells along with varying masses of a plasmid that expressed Rev from the CMV  
115 immediate early promoter (pCMV-Rev). Flow cytometry was performed to determine the mean  
116 fluorescent intensity of the Rev-dependent signal (eGFP) and the Rev-independent signal  
117 (mCherry or TagBFP). Gating was conducted as described in Methods and Figure 2 (a-c).  
118 Relative Rev-RRE functional activity was calculated as the ratio of Rev-dependent to Rev-  
119 independent signal for each experimental condition.

120           Only minimal eGFP signal was observed in the absence of Rev for both HIV-derived  
121 constructs (Figure 3). The Rev-RRE activity for both constructs in the 0 ng Rev condition (0.15  
122 for the GFP-mCherry construct and 0.14 for the GFP-BFP construct) was more than 30-fold less  
123 than when the lowest tested amount of Rev plasmid (6.25 ng) was included in the transfection  
124 (5.59 and 4.33, respectively) and more than 600-fold less than when the maximum tested  
125 amount of Rev plasmid (100 ng) was included (value set as 100 for both constructs). While a  
126 low level of eGFP “leakiness” is apparent in the flow cytometry dot plots (Figure 3, a and b), this  
127 occurred only when there was very high expression of the Rev-independent signal (mCherry or  
128 TagBFP) and the system behaved in a highly Rev-responsive fashion. For both constructs, the  
129 Rev-independent signal decreased slightly between the 0 ng and 100 ng Rev conditions (2.1  
130 fold for the eGFP-mCherry construct and 2.6 fold for the eGFP-TagBFP construct), but the  
131 eGFP signal increased dramatically (313-fold for eGFP-mCherry and 268-fold for eGFP-  
132 TagBFP) (Figure S1). The ratio of Rev-dependent to Rev-independent signal was calculated for  
133 each condition and both constructs displayed a strongly linear increase in functional activity with  
134 increasing amounts of Rev plasmid over the tested range (eGFP-mCherry construct  $r^2=0.992$ ,  
135 eGFP-TagBFP construct  $r^2=0.999$ ) (Figure 3 c).

136           To demonstrate that the CHYSEL sequence functioned to create a free eGFP protein  
137 and a separate Gag fragment rather than a Gag-eGFP fusion product, the HIV-derived construct

138 was transfected into 293T/17 cells along with a plasmid that expressed Rev (pCMV-Rev). A  
139 Western blot was performed from cell lysate that demonstrated high efficiency functioning of the  
140 CHYSEL sequence to produce free eGFP (Figure S2).

141

142 *Measurement of differences in Rev and RRE activity.*

143

144 We have previously described Rev and RRE sequences that display significantly  
145 different functional activity in prior assays<sup>23, 24</sup>. To assess whether the fluorescence-based assay  
146 recapitulates these activity differences, assay constructs were created using previously tested  
147 Revs and RREs.

148 We first tested a known higher-activity RRE (SC3-M57A) along with a known lower-  
149 activity RRE (SC3-M0A) sequence that were both derived from naturally occurring viruses in a  
150 single patient. These were previously determined to have significantly different activities in a  
151 study using a sub-genomic GagPol reporter assay, though both RREs had higher activity than  
152 that from NL4-3<sup>24</sup>. New eGFP-TagBFP HIV-derived constructs were created by replacing the  
153 native RRE sequence with a 234-nt RRE derived from each virus. The NL4-3 RRE was used for  
154 comparison. All three RRE-containing constructs were transfected into 293T/17 cells along with  
155 varying amounts of a CMV-Rev plasmid. All three constructs displayed tight Rev  
156 responsiveness with minimal calculated activity in the absence of Rev (Figure 4 a). As  
157 expected, the SC3-M57A RRE displayed substantially greater functional activity than the SC3-  
158 M0A with all tested amounts of Rev plasmid.

159 We also previously described two naturally occurring subtype G HIV-1 Rev proteins with  
160 substantially different activity as assessed with a sub-genomic lentiviral vector packaging  
161 assay<sup>23</sup>. CMV-Rev plasmids were created expressing high-activity 9-G Rev, low activity 8-G  
162 Rev, or NL4-3 Rev. A single eGFP-TagBFP HIV-derived construct containing an NL4-3 RRE  
163 was transfected into 293T/17 cells along with varying amounts of each of the CMV-Rev

164 constructs. The fluorescent assay replicated the previously observed difference in activity, with  
165 the expected high-activity 9-G Rev yielding substantially greater Rev-RRE functional activity  
166 than the 8-G Rev (Figure 4 b). Interestingly, we have previously shown that the difference in 9-G  
167 Rev and 8-G Rev functional activity is not correlated with steady state Rev protein levels<sup>23</sup>.

168

169 *Evaluation of non-Rev/RRE nuclear export systems.*

170

171 To determine whether the fluorescence-based assay system could detect expression  
172 accomplished using mechanisms other than the HIV-1 Rev-RRE system, constructs were  
173 created containing elements from the “simple retrovirus” Mason-Pfizer monkey virus (MPMV),  
174 the human *NXF1* gene, and the human endogenous retrovirus HERV-K which are known to  
175 promote the export and translation of mRNAs with retained introns.

176 The MPMV CTE directly mediates interaction between the viral mRNA with a retained  
177 intron and cellular export factors without the requirement for an additional viral protein. An  
178 eGFP-mCherry HIV-derived construct was created with the 162-nt MPMV CTE substituting for  
179 the HIV RRE within *env*. A negative control construct was created for comparison by removing  
180 the RRE and not substituting an alternative element. Both the MPMV CTE construct and the no  
181 element construct were transfected into 293T/17 cells along with plasmids to overexpress the  
182 cellular factors NXF1 and NXT1 that have been shown previously to enhance expression of  
183 proteins from mRNA whose export has been mediated by the CTE function in 293T cells<sup>36</sup>. The  
184 vector with the MPMV CTE showed clear functional activity that was 8-fold higher than  
185 background ( $P=3.11 \times 10^{-8}$ ) (Figure 5 a).

186 A cellular CTE with a similar sequence and nearly identical structure to one of the 70-nt  
187 degenerate repeats present in the MPMV CTE is found in the human *NXF1* gene within its  
188 intron 10<sup>5</sup>. While the 162-nt MPMV CTE contains two internal RNA loops known to interact with  
189 cellular export factors, the 96-nt *NXF1* CTE contains only a single loop. We created constructs



190 that contained either one or two NXF1 CTEs to assess the functional implication of the number  
191 of NXF1 binding loops for vector activity. These constructs were then transfected into 293T/17  
192 cells along with plasmids that overexpress the cellular factors NXF1 and NXT1. The single CTE  
193 construct displayed 3-fold increased activity relative to the no element background ( $P=0.012$ ),  
194 while the dual CTE construct displayed much greater activity, 33-fold over background  
195 ( $P=0.00001$ ) (Figure 5 b). Taken together, these results show that the vector system can be  
196 used to assess the function of potential viral and cellular CTEs.

197 Like other complex retroviruses, the HERV-K (HML-2) provirus contains both an RNA  
198 element RRE analogue called RcRE and a Rev viral protein analogue called Rec<sup>37, 38</sup>. To  
199 assess whether the activity of this system could be scored in the fluorescent assay, HIV-derived  
200 constructs were created in which the RRE was replaced with either one or two 433-nt RcRE  
201 sequences in tandem. The RcRE containing HIV-derived constructs, and an RRE-containing  
202 construct for reference, were transfected into 293T/17 cells along with varying amounts of a  
203 CMV-Rec plasmid. As expected, the RRE-containing construct did not display significant  
204 functional activity, as Rec does not function on the RRE<sup>37</sup> (Figure 5 c). Both the single RcRE  
205 and dual RcRE constructs showed linear increases in functional activity with increasing amounts  
206 of Rec plasmid ( $r^2=0.931$  and  $0.991$ , respectively) (Figure 5 c). The dual RcRE construct  
207 showed substantially greater activity than the single RcRE construct in the presence of  
208 functional Rec ( $P=0.00016$ ) (Figure 5 d). Thus, it should be possible to use this vector to detect  
209 functional endogenous Rec expression in cells that have active Herv-K expression.

210

211 *Specific inhibition of the Rev-RRE pathway by small molecules.*

212

213 Due to its central role in the HIV life cycle, the Rev-RRE regulatory axis is an attractive  
214 therapeutic target. Small molecules that inhibit the Rev-RRE pathway have been developed,  
215 though none have yet entered clinical use for the treatment of HIV<sup>39</sup>. A heterocyclic compound

216 designated 103833 and its derivatives have previously been shown to inhibit Rev-RRE  
217 functional activity in luciferase and GagPol subgenomic reporter assays<sup>40, 41</sup>. We tested the  
218 effect of this compound on both Rev-RRE activity and MPMV CTE activity in the fluorescent  
219 assay. 293T/17 cells were pre-treated with varying concentrations of 103833 and the incubation  
220 with the compound was continued after transfection with two different sets of plasmids. The  
221 effect on the Rev-RRE pathway was tested by transfecting cells with the two color fluorescent  
222 construct containing the NL4-3 RRE along with a separate CMV-Rev construct. The effect on  
223 the CTE pathway was tested by transfecting cells with the two color fluorescent construct  
224 containing the MPMV CTE along with plasmids to overexpress NXF1 and NXT1.

225 For both constructs, the signal intensity of the fluorescent protein expressed from the *nef*  
226 position, mCherry, was not affected by the presence of 103833 (Figure 6 a, boxes). The signal  
227 intensity of the protein expressed from the *gag* position, eGFP, showed an inverse relationship  
228 with 103833 concentrations only in the case of the RRE-containing construct but not for the  
229 CTE-containing construct (Figure 6 a, circles). Thus, the functional activity of the Rev-RRE  
230 construct decreased with increasing 103833 concentrations, but the functional activity of the  
231 CTE construct remained constant. This is consistent with specific inhibition of the Rev-RRE  
232 pathway as previously described. Additionally, the fact that the mCherry signal was unaltered  
233 shows that it is a good internal indicator for non-specific effects and toxicity. These results  
234 demonstrate the utility of the assay for drug screening.

235

236 *Rev-RRE pathway inhibition by trans-dominant negative Rev M10.*

237

238 An alternative approach to Rev-RRE pathway inhibition is through use of a modified  
239 *trans*-dominant negative Rev protein. Rev M10 is a Rev sequence with a mutation in the nuclear  
240 export signal and is a well-characterized *trans*-dominant inhibitor of Rev function<sup>42</sup>. We decided  
241 to test the effect of Rev M10 on the fluorescence-based functional assay. To do this, 293T/17

242 cells were transfected with the eGFP-TagBFP HIV-derived construct containing an NL4-3 RRE  
243 together with a constant amount of the MSCV construct expressing a bicistronic transcript  
244 consisting of the NL4-3 Rev and mCherry genes linked with an internal ribosomal entry site  
245 (IRES). The MSCV construct permitted the measurement of mCherry fluorescence as a  
246 surrogate for the level of NL4-3 Rev expression. Additionally, the cells were transfected with  
247 variable amounts of a plasmid that expressed Rev M10 from a CMV immediate early promoter  
248 (pCMV-RevM10). To compensate for the varying amount of Rev M10 plasmid added, an  
249 appropriate amount of a pCMV plasmid without an insert was also added.

250 Figure 6 b demonstrates that as the amount of Rev M10 plasmid added to the  
251 transfection increased, the Rev-dependent eGFP signal decreased. Notably, there was no  
252 change in the mCherry signal, indicating that the amount of functional NL4-3 Rev remained  
253 constant. In addition, the TagBFP signal also remained constant, indicating that Rev-  
254 independent expression from the HIV construct was not inhibited. Thus, *trans*-dominant  
255 inhibition by Rev M10 could be clearly demonstrated in this assay. This data, combined with the  
256 drug inhibition data described above, demonstrates that this assay can easily measure  
257 perturbations of Rev-RRE functional activity that are caused by different mechanisms.

258

259 *Measurement of Rev-RRE functional activity using packaged assay constructs.*

260

261 Both the HIV-derived RRE-containing constructs and the MSCV-derived Rev-containing  
262 constructs were designed to be packageable as viral vectors. The ability to package these  
263 constructs allows transduction, rather than transfection of target cells. This permits the assay of  
264 Rev and RRE functional activity in different cell types, including primary cells, from an integrated  
265 provirus. To demonstrate the ability of the fluorescent assay to assess Rev-RRE functional  
266 activity after transduction, a construct carrying the NL4-3 RRE was tested in combination with

267 the three different Revs that were assayed above and known to have varying functional  
268 activities.

269 Three MSCV constructs were created, each carrying a different Rev sequence and  
270 expressing a bicistronic transcript encoding both Rev and an mCherry gene separated by an  
271 IRES. The Rev sequences included the low-activity (8-G), the high-activity (9-G), and the NL4-3  
272 Revs utilized above<sup>23</sup>. An HIV-derived RRE-containing construct carrying eGFP and TagBFP as  
273 markers was used as the fluorescent reporter. The HIV-derived and MSCV-derived constructs  
274 were packaged in 293T/17 cells using transient transfection systems with appropriate packaging  
275 constructs and pseudotyped using VSV-G. The resulting viral stocks were then used to  
276 transduce the CEM-SS lymphoid cell line, either with the HIV-derived construct alone or with the  
277 HIV-derived and an MSCV-derived construct in combination.

278 Cells were successfully transduced with both constructs. Gating was performed on cells  
279 expressing the fluorescent marker from the MSCV-derived construct, then an eGFP vs TagBFP  
280 plot was constructed to show cells expressing the markers carried on the HIV-derived construct  
281 (Figure 7 a). Rev-RRE functional activity (the ratio of eGFP to TagBFP fluorescence) was  
282 calculated from the co-transduced population that expressed fluorescent markers from both  
283 vectors (i.e. cells included in quadrants 1, 2, and 3 in Figure 7 a). The results showed that the  
284 functional activity of NL4-3 Rev and 9-G Rev are both greater than the 8-G Rev (Figure 7d).  
285 Thus, the functional activity of the Revs in the T cell line on integrated provirus was similar to  
286 that found in the transient transfection assay in 293T/17 cells. Figure 7a-c also shows that a  
287 minority of cells that received both the reporter plasmid and the Rev-expressing vector  
288 (quadrant Q3) did not express eGFP. The existence of this population would be obscured in  
289 assays dependent on bulk protein expression, such as p24 reporter assays, and is only  
290 apparent due to the cell-level resolution of this system. Additional studies are underway to  
291 evaluate the population of cells that are successfully transduced with both constructs and yet do  
292 not express eGFP. Rev function in this population may be compromised in some fashion.

293

294 *Creation of a stable T-cell line containing a single integrated copy of the HIV-derived reporter*  
295 *vector.*

296

297 To establish clonal stable cell lines, CEM-SS cells were transduced with the HIV-derived  
298 vector containing mCherry in the *nef* position and eGFP in *gag*. Individual clones expressing  
299 mCherry were then derived from the transduced cells by limiting dilution. Clones were analyzed  
300 for mCherry and eGFP expression. Clone 5 showed a very uniform and strong mCherry  
301 expression with virtually no eGFP or tag-BFP signal (Figure 8, left side plots). Integration of a  
302 single copy of the HIV-derived construct within an intergenic region of chromosome 9  
303 (downstream of gene RGP1 and upstream of long non-coding RNA AL1333410; chromosome 9:  
304 35765800) was determined by inverse PCR (data not shown). The cells were then transduced  
305 with the MSCV vector expressing NL4-3 Rev and TagBFP (Figure 8, right side plots). About 8%  
306 of cells expressed TagBFP (Figure 8 a), demonstrating successful transduction with the MSCV  
307 construct, and a similar percent expressed eGFP from the unspliced *gag* transcript (Figure 8 b).  
308 It is likely that the different levels of eGFP and tag-BFP expression stem from the fact that the  
309 integration site of the MSCV vector in each transduced cell is different, and this leads to  
310 different levels of expression from the integrated proviral vector. Significantly there was a good  
311 linear correlation of BFP versus eGFP expression levels, indicating that cells that expressed  
312 higher Rev levels also expressed higher levels of the mRNA with the retained intron (Figure 8  
313 c). These cells were subjected to cell sorting, allowing us to obtain cells that have different  
314 levels of Rev expression that can be used for further studies.

315

316 **Discussion.**

317

318 In this paper, we describe a novel easily manipulated system that allows the detection  
319 and characterization of RNA elements and trans-acting protein factors that promote the  
320 nucleocytoplasmic export and translation of mRNAs with retained introns. Intron retention is  
321 essential for retrovirus replication. Furthermore, intron retention in cellular genes is increasingly  
322 recognized as playing an important role in development and differentiation, as well as in disease  
323 states such as cancer and responses to cellular insults<sup>1</sup>. In the case of complex retroviruses,  
324 such as HIV and EIAV, there is also considerable evidence that different viral isolates vary  
325 significantly in their ability to express intron-containing viral RNA and that these differences are  
326 important in pathogenesis and possibly also in the regulation of viral latency<sup>17, 23, 24, 27, 30</sup>. The  
327 ability to detect and functionally characterize the RNA elements and proteins involved in the  
328 export and translation of mRNAs with retained introns is essential for further insights into the  
329 fate and regulation of these mRNAs.

330 Our assay system improves on previous reporter assays in several important respects.  
331 First, the use of three fluorescent proteins as reporters allows the simultaneous measurement of  
332 expression from the mRNA with the retained intron, the overall transcription level of the reporter  
333 vector, and the level of expression of the trans-acting protein involved in RNA export.  
334 Furthermore, the use of flow cytometry to quantify expression levels provides for more rapid  
335 acquisition of data compared with prior assays. Many previous reporter assays have required  
336 collection of cells and subsequent quantification of non-fluorescent proteins such as p24 by  
337 ELISA<sup>24</sup> or enzymatic activity<sup>32</sup>. In other cases, RNA export function has been measured by the  
338 determination of vector titer<sup>23</sup>. The assay described here will permit more rapid determination of  
339 the activity of larger numbers of Rev and RRE sequences derived from HIV patients. This will  
340 allow the evaluation of the larger data sets that are needed to make good statistical correlations  
341 of Rev-RRE activity with specific clinical outcomes. It will also more readily allow the  
342 identification of novel RNA elements in cellular genes, and facilitate drug discovery targeting the  
343 interaction of RNA signals with the protein factors that recognize them.

344           Second, nearly all previous reporter assays have measured the expression of mRNA  
345 with retained introns from DNA plasmids that have been transiently expressed, despite the fact  
346 that there is considerable evidence that mRNA export factors first encounter the mRNA when  
347 they are in the process of being newly transcribed from chromatin<sup>43, 44</sup>. In the assay described  
348 here, the vectors can be packaged into infectious retrovirus-vector particles which integrate into  
349 the host cell genome. This allows measurement of expression of mRNAs with retained introns  
350 that have been transcribed from chromatin, rather than transiently from transfected plasmids,  
351 and is thus less artificial than previous assays. Overexpression of both the reporter mRNA and  
352 export factor can also be avoided by manipulating the multiplicity of infection such that single  
353 copies of reporter construct and the gene for the trans-acting protein factor are present in a cell.  
354 This is important, as we know, for example, that in the case of HIV high levels of Rev protein  
355 expression produce artifactual results and only low levels of Rev are expressed in an infected  
356 cell<sup>45</sup>. The ability to package and pseudotype the vector constructs also permits the use of the  
357 assay in diverse cell types and primary cells, rather than in only easily transfectable cell lines.  
358 Thus, our assay system much more closely resembles the conditions of natural HIV infection  
359 and the expression of normal levels of cellular mRNA.

360           Third, the ability to stably integrate assay constructs into the host cell chromosome also  
361 permits the creation of cell lines containing one or both assay constructs. Using the CEM-SS T-  
362 cell line, we created a clonal population containing a single integrated copy of an HIV-derived  
363 assay construct within an intergenic region. This cell line constitutively expresses the Rev-  
364 independent fluorescent marker (mCherry), but expresses the Rev-dependent marker (eGFP)  
365 only after transfection or transduction with a Rev-containing construct. When this cell line is  
366 transduced with an MSCV-derived construct carrying HIV Rev and TagBFP, eGFP expression  
367 increases linearly with TagBFP expression. This demonstrates a close correlation between Rev  
368 levels and eGFP expression, and the linear responsiveness of the system. Thus, the creation of  
369 this cell line and others will permit more rapid drug screening studies and studies of the cellular

370 determinants involved in the export and translation of mRNA with retained introns during HIV  
371 infection. Similar cell lines can also be created using these constructs containing cellular CTEs  
372 to evaluate the role of cellular proteins in the export and translation of cellular mRNAs with  
373 retained introns.

374 In summary, we have described a novel high-throughput fluorescence-based assay of  
375 intron retention that permits the functional characterization of mechanisms that promote  
376 expression from mRNAs with retained introns, including systems from complex and simple  
377 retroviruses and cellular genes. This assay represents a substantial improvement from previous  
378 assays in that studies can be performed at the level of integrated proviral constructs in a variety  
379 of cell lines and primary cell types. Applications for this assay include drug screening for  
380 compounds that inhibit or promote the export of mRNAs with retained introns, identification of  
381 cellular CTEs, and investigation of the evolution of the Rev-RRE axis in clinical disease  
382 progression during HIV infection.

383

## 384 **Methods.**

385

### 386 *Creation of assay constructs.*

387

388 HIV-derived constructs were created by modifying a plasmid containing the full-length  
389 genome of laboratory strain NL4-3 (Genbank accession U26942) (Figure 1)<sup>34, 46</sup>. To create the  
390 fluorescent signal from the unspliced transcript, *gag* was truncated at amino acid 407 and a  
391 cassette was inserted in-frame containing a CHYSEL sequence derived from porcine  
392 teschovirus-1<sup>35</sup> and the *eGFP* gene<sup>47</sup>. To create the fluorescent signal from the completely  
393 spliced transcript, *nef* was deleted and replaced with either an *mCherry*<sup>48</sup> or *TagBFP* gene<sup>49</sup>.  
394 The construct was further modified to silence the native *rev* and to further render the construct



395 replication incompetent<sup>50</sup>. Finally, the 351-nt RRE sequence within *env* was flanked by an XmaI  
396 and XbaI site to permit easy replacement.

397 To create the MSCV constructs, Rev sequences were cloned into MSCV-based  
398 plasmids containing the genes for fluorescent proteins (Figure 1). *Rev* was cloned upstream of  
399 an IRES-fluorescent protein cassette, such that both Rev and the fluorescent protein are  
400 expressed from a bicistronic transcript. Additional non-MSCV Rev-containing plasmids were  
401 created using an immediate early CMV promoter to drive Rev expression without a fluorescent  
402 marker. Additional descriptions of the assay constructs are available in Supplemental Methods.

403 Versions of the HIV-derived construct containing different export elements were created  
404 by replacing the RRE with alternative sequences. These constructs are denominated in the text  
405 as pNL4-3(unsliced transcript fluorescent marker)(transport element)(spliced transcript  
406 fluorescent marker), as in pNL4-3(eGFP)(NL4-3 RRE)(mCherry). Similarly, different Rev  
407 sequences or other *trans*-acting proteins were substituted in the MSCV-derived construct.  
408 These constructs are denominated pMSCV - *trans*-acting protein – IRES – fluorescent marker,  
409 as in pMSCV-NL4-3 Rev-IRES-TagBFP. The CMV constructs are denominated as in CMV-NL4-  
410 3 Rev.

411

412 *Western blot of Gag-CHYSEL-eGFP product.*

413

414 A Western blot was performed to test the cleavage efficiency of the CHYSEL sequence  
415 incorporated in the *gag*-CHYSEL-*eGFP* cassette. 293T/17 cells were transfected with  
416 constructs expressing eGFP alone, the *gag*-CHYSEL-*eGFP* cassette, a *gag*-*eGFP* fusion  
417 sequence, and mCherry as a negative control. Western blotting was performed on cell lysate  
418 using primary antibodies to eGFP and p24<sup>51</sup>. Additional details are available in the  
419 Supplemental Methods.

420

421 *Transfection-based functional assays.*

422 The assay system permits determination of Rev-RRE functional activity at the level of  
423 transfection. 293T/17 cells were co-transfected with an HIV-derived construct and either a  
424 MSCV-derived construct or CMV-Rev using the polyethylenamine method<sup>52</sup>. Cells were  
425 incubated for 24 hours after transfection. Flow cytometry was performed using the Attune NxT  
426 flow cytometer with autosampler attachment (Thermo Fischer Scientific). Data analysis,  
427 including color compensation, was performed using FlowJo v10 (FlowJo, LLC). Further details  
428 are available in the Supplemental Methods.

429 The gating schemes used are shown in Figure 2. Cells were selected (panel a) and cell  
430 aggregates excluded (b). Cells expressing the HIV-derived construct (bottom) were identified by  
431 reference to a negative control (top) (c). Untransfected cells in the bottom left quadrant were  
432 excluded from further analysis. When an MSCV-derived construct was used, a derived gate  
433 from (b) was constructed to include only cells expressing the third fluorescent marker linked to  
434 the *trans*-acting protein (d). Finally, cells expressing both constructs were included in a final  
435 analysis (e).

436 To calculate the activity of the intron export mechanism, cells in the appropriate gate for  
437 analysis (panel c excluding the bottom left quadrant or e) were considered. The arithmetic mean  
438 fluorescence intensity (MFI) was determined for both fluorescent signals of the HIV-derived  
439 construct, and the ratio of the unspliced transcript marker MFI (i.e. eGFP) to the spliced  
440 transcript marker MFI (e.g. TagBFP or mCherry) was calculated. The resulting ratio was  
441 adjusted by subtracting the activity of the 0 ng Rev condition (or equivalent) to compensate for  
442 eGFP “leakiness.” Finally, functional activity values within the experiment were expressed as a  
443 proportion of the maximum for any condition, which is set as 100.

444

445 *Rev titration assay.*

446

447           The responsiveness of the HIV-derived construct to increasing amounts of Rev plasmid  
448 was determined. 1000 ng of the HIV-derived construct pNL4-3(eGFP)(NL4-3 RRE)(TagBFP)  
449 (pHR5564) was transfected into  $8 \times 10^5$  293T/17 cells along with 0, 6.25, 12.5, 25, 50, or 100 ng  
450 of CMV-NL4-3 Rev plasmid (pHR5186). The total mass of DNA in each transfection was kept  
451 constant by the addition of varying masses of an empty CMV plasmid (pHR16). Flow cytometry  
452 was performed 36 hours after transfection.

453

454 *Assay of different RRE sequences.*

455

456           Three HIV-derived constructs expressing eGFP and TagBFP were created by replacing  
457 the native RRE sequence with alternative 234-nt RREs. The RREs were from NL4-3 (pHR5580)  
458 as well as two patient-derived viruses: SC3-M0A and SC3-M57A (Genbank accession  
459 KF559160.1 and KF559162.1; pHR5584 and pHR5586)<sup>24</sup>. In a previous assay system, SC3-  
460 M57A was found to have higher activity than SC3-M0A<sup>24, 53</sup>. The constructs were tested  
461 individually by transfecting them into 293T/17 cells along with 0, 25, 50, or 100 ng of CMV-SC3  
462 Rev plasmid using a Rev sequence from the same patient as the RRE sequences (Genbank  
463 accession KF559146; pHR4776)<sup>24</sup>. The total DNA mass in each condition was kept constant by  
464 the addition of a variable mass of an empty CMV construct (pHR16).

465

466 *Assay of different Rev sequences.*

467

468           Three MSCV-derived constructs expressing mCherry and one of three different Revs  
469 were created. The Rev sequences used were from NL4-3 (pHR5625) and two subtype G HIV  
470 viruses: 8-G and 9-G (Genbank accession FJ389367<sup>54</sup> and JX140676<sup>55</sup>; pHR5629 and  
471 pHR5627). In a previous assay system, 9-G was found to have higher activity than 8-G Rev<sup>23</sup>.  
472 293T/17 cells were transfected with 1000 ng pNL4-3(eGFP)(NL4-3 RRE)(TagBFP) (pHR5580)

473 along with 0, 12.5, 25, 50, 100, or 200 ng of each of the MSCV constructs. The total DNA mass  
474 in each transfection was kept constant by addition of a variable mass of an empty CMV plasmid  
475 (pHR16).

476

477 *Assay of HERV-K RcRE and Rec activity.*

478

479 An HIV-derived eGFP-mCherry construct was modified by replacing the HIV RRE  
480 sequence with a 433-nt HERV-K RcRE sequence (Genbank accession AF179225.1<sup>37</sup>,  
481 pHR5476). An additional HIV construct was created by inserting a second identical RcRE  
482 sequence in tandem (pHR5631). Both RcRE-containing constructs and an HIV-derived RRE-  
483 containing construct (pHR5460), were tested by transfecting them individually into 293T/17 cells  
484 along with 0, 50, 100, 200, and 400 ng of a CMV plasmid containing the HERV-K Rec gene  
485 (Genbank accession AY395522.1<sup>38</sup>), CMV-Rec (pHR5313). Flow cytometry was performed 48  
486 hours after transfection. This experiment was repeated for the 200 ng CMV-Rec condition to  
487 obtain additional replicates.

488 Statistical analysis was performed using SPSS v25 (IBM). R-squared values for Figure  
489 5c were calculated using the linear regression function and *P* values for Figure 5d were  
490 calculated using an independent-samples T-test.

491

492 *Assay of CTE activity.*

493

494 A 96-nt CTE derived from intron 10 of *NXF1* was incorporated into an eGFP-mCherry  
495 HIV-derived construct in place of the RRE (see Genbank reference sequence NM\_001081491.1  
496 bases 1928 to 2023, pHR5781)<sup>5</sup>. An additional construct was created from this vector by  
497 inserting a second *NXF1* CTE within *env* at the NheI site (pHR5783). Another HIV-derived

498 construct was created by replacing the RRE with a single copy of a 162-nt CTE from MPMV  
499 (Genbank accession AF033815.1 bases 7388 to 7549, pHR5608)<sup>2,3</sup>.

500 Each of the resulting CTE constructs were tested by transfecting 1000 ng of each  
501 individually into 293T/17 cells along with CMV-Nxf1 plasmid (pHR3704) and CMV-Nxt1 plasmid  
502 (pHR2415) to overexpress these cellular factors. The MPMV CTE experiments were performed  
503 using 100 ng Nxf1 plasmid and 200 ng Nxt1; the NXF1 CTE experiments were performed using  
504 100 and 25 ng, respectively. Flow cytometry was performed 48 hours after transfection.

505 Statistical analysis of the activity differences of the CTE constructs was performed using  
506 SPSS Statistics v25 (IBM). P-values were calculated using an independent-samples T-test for  
507 Figure 5a and a two-tailed one-way ANOVA with Tukey's HSD test for Figure 5b.

508

509 *Small molecule Rev-RRE pathway inhibitor assay.*

510

511 A previously described heterocyclic compound, 3-amino-5-ethyl-4,6-dimethylthieno[2,3-  
512 b]pyridine-2-carboxamide (103833), inhibits Rev-RRE function<sup>40</sup>. 293T/17 cells were pre-treated  
513 with varying concentrations of 103833 and the incubation with the compound was continued  
514 after transfection. To test the response of the Rev-RRE system to the inhibitor, cells were  
515 transfected with 1000 ng of pNL4-3(eGFP)(NL4-3 RRE)(mCherry) (pHR5460) and 100 ng of  
516 pMSCV-NL4-3 Rev-IRES-TagBFP (pHR5420). To test the response of the CTE system, cells  
517 were transfected with 1000 ng of pNL4-3(eGFP)(MPMV CTE)(mCherry) (pHR5608), 133 ng  
518 CMV-Nxf1 (pHR3704), and 33 ng CMV-NxT1 (pHR2415). Data analysis was conducted by  
519 gating on cells successfully transduced with the HIV-derived two-color constructs (see Figure 2  
520 panel c). Additional details are available in the Supplemental Methods.

521

522 *Trans-dominant negative Rev M10 assay.*

523

524 To measure the effect of the co-expression of Rev M10<sup>42</sup> on Rev-RRE activity,  $4 \times 10^5$   
525 293T/17 cells were transfected with 1000 ng pNL4-3(eGFP)(NL4-3 RRE)(TagBFP) (pHR5580),  
526 75 ng pMSCV-NL4-3 Rev-IRES-mCherry (pHR5625), and either 600 ng, 400 ng, 200 ng, 100  
527 ng, 50 ng, or 0 ng of CMV-Rev M10 (pHR636). Variable amounts of an empty CMV plasmid  
528 (pHR16) were included to maintain a constant DNA mass in each transfection. Data analysis  
529 was performed by gating on cells successfully transduced with the HIV-derived construct (see  
530 Figure 2 panel c). The arithmetic MFI of mCherry was determined to measure relative  
531 expression of NL4-3 Rev.

532

533 *Packaging and titering HIV and MSCV constructs.*

534

535 The HIV-derived construct pNL4-3(eGFP)(NL4-3 RRE)(TagBFP) (pHR5580) was  
536 packaged and VSV-G pseudotyped using a transient second generation packaging system  
537 including psPAX2 (Addgene plasmid 12260, pHR5691) and pMD2.G (Addgene plasmid 12259,  
538 pHR5693). Three MSCV constructs of the form pMSCV-Rev-IRES-mCherry carrying the NL4-3,  
539 8-G, or 9-G Revs (pHR5625, 5629, 5627 respectively) were packaged as well in a transfection  
540 system that included pHIT60-CMV-GagPol<sup>56</sup> (pHR1854) and pMD2.G (pHR5693). Vector stock  
541 titer was determined in 293T/17 cells using constitutively expressed fluorescent proteins as the  
542 marker of transduction. Additional details are available in the Supplemental Methods.

543

544 *Assay of Rev activity in transduced cells.*

545

546 The relative functional activity of Rev-RRE pairs was assayed by co-transducing CEM-  
547 SS cells with viral vectors derived from pNL4-3(eGFP)(NL4-3 RRE)(TagBFP) and the different  
548 pMSCV-Rev-IRES-mCherry constructs<sup>57, 58</sup>. As controls, the vectors were also added to the  
549 CEM-SS cultures individually. Seventy-two hours after transduction, cells were harvested and

550 flow cytometry was performed. Functional activity was determined by gating on cells transduced  
551 with both constructs (see Figure 2 panel e). See the Supplemental Methods for additional  
552 details.

553

554 *Creation of T-cell line containing the integrated two color reporter construct.*

555

556 To create a cell line with a stably integrated HIV-derived proviral construct carrying  
557 eGFP and mCherry, CEM-SS cells were transduced with a VSV-G pseudotyped pNL4-  
558 3(eGFP)(NL4-3 RRE)(mCherry) viral vector (pHR5604). A limiting dilution was performed in 96  
559 well plates to generate monoclonal populations, and clones expressing the HIV-derived  
560 construct were identified by looking for mCherry expression via fluorescent microscopy. The  
561 presence of a single integrated copy of the HIV construct was confirmed by a modified inverse  
562 PCR procedure<sup>59</sup>. Additional details are available in the Supplemental Methods.

563 After identifying a clone with a single integrated HIV-derived construct, intron export was  
564 demonstrated by transducing cells with the VSV-G pseudotyped pMSCV-NL4-3 Rev-IRES-  
565 TagBFP (pHR5420) construct as above. Seventy-two hours after transduction, eGFP, mCherry,  
566 and TagBFP expression was quantified by flow cytometry.

567

#### 568 **Data Availability.**

569 No datasets were generated or analyzed during the current study. Sequences of the  
570 evaluated intron-retention elements are available from Genbank at the accession numbers  
571 included in the text. Plasmids and cell lines utilized in this study are available from the authors  
572 upon request.

573

#### 574 **References.**

575 References

- 576 1. Rekosh, D. & Hammarskjold, M. Intron retention in viruses and cellular genes: Detention,  
577 border controls and passports. *Wiley Interdisciplinary Reviews: RNA* **9**, e1470 (2018).
- 578 2. Petropoulos, C. Retroviral taxonomy, protein structures, sequences, and genetic maps.  
579 *Retroviruses. Cold Spring Harbor Laboratory Press, Cold Spring Harbor, NY, 757-805* (1997).
- 580 3. Bray, M. *et al.* A small element from the Mason-Pfizer monkey virus genome makes human  
581 immunodeficiency virus type 1 expression and replication Rev-independent. *Proc. Natl. Acad.*  
582 *Sci. U. S. A.* **91**, 1256-1260 (1994).
- 583 4. Grüter, P. *et al.* TAP, the human homolog of Mex67p, mediates CTE-dependent RNA export  
584 from the nucleus. *Mol. Cell* **1**, 649-659 (1998).
- 585 5. Li, Y. *et al.* An intron with a constitutive transport element is retained in a Tap messenger  
586 RNA. *Nature* **443**, 234 (2006).
- 587 6. Li, Y. *et al.* An NXF1 mRNA with a retained intron is expressed in hippocampal and  
588 neocortical neurons and is translated into a protein that functions as an Nxf1 cofactor. *Mol. Biol.*  
589 *Cell* **27**, 3903-3912 (2016).
- 590 7. Bor, Y. C. *et al.* The Wilms' tumor 1 (WT1) gene (+KTS isoform) functions with a CTE to  
591 enhance translation from an unspliced RNA with a retained intron. *Genes Dev.* **20**, 1597-1608  
592 (2006).
- 593 8. Fernandes, J. D., Booth, D. S. & Frankel, A. D. A structurally plastic ribonucleoprotein  
594 complex mediates post-transcriptional gene regulation in HIV-1. *Wiley Interdisciplinary Reviews:*  
595 *RNA* **7**, 470-486 (2016).
- 596 9. Frankel, A. D. & Young, J. A. HIV-1: fifteen proteins and an RNA. *Annu. Rev. Biochem.* **67**, 1-  
597 25 (1998).
- 598 10. Pollard, V. W. & Malim, M. H. The HIV-1 rev protein. *Annual Reviews in Microbiology* **52**,  
599 491-532 (1998).
- 600 11. Frankel, A. D. & Young, J. A. HIV-1: fifteen proteins and an RNA. *Annu. Rev. Biochem.* **67**,  
601 1-25 (1998).
- 602 12. Hadzopoulou-Cladaras, M. *et al.* The rev (trs/art) protein of human immunodeficiency virus  
603 type 1 affects viral mRNA and protein expression via a cis-acting sequence in the env region. *J.*  
604 *Viol.* **63**, 1265-1274 (1989).
- 605 13. Hammarskjold, M. L. *et al.* Regulation of human immunodeficiency virus env expression by  
606 the rev gene product. *J. Virol.* **63**, 1959-1966 (1989).
- 607 14. Malim, M. H., Hauber, J., Le, S., Maizel, J. V. & Cullen, B. R. The HIV-1 rev trans-activator  
608 acts through a structured target sequence to activate nuclear export of unspliced viral mRNA.  
609 *Nature* **338**, 254-257 (1989).



- 610 15. Bai, Y., Tambe, A., Zhou, K. & Doudna, J. A. RNA-guided assembly of Rev-RRE nuclear  
611 export complexes. *Elife* **3**, e03656 (2014).
- 612 16. Neville, M., Stutz, F., Lee, L., Davis, L. I. & Rosbash, M. The importin-beta family member  
613 Crm1p bridges the interaction between Rev and the nuclear pore complex during nuclear  
614 export. *Current Biology* **7**, 767-775 (1997).
- 615 17. Baccam, P. *et al.* Subpopulations of equine infectious anemia virus Rev coexist in vivo and  
616 differ in phenotype. *J. Virol.* **77**, 12122-12131 (2003).
- 617 18. Hidaka, M., Inoue, J., Yoshida, M. & Seiki, M. Post-transcriptional regulator (rex) of HTLV-1  
618 initiates expression of viral structural proteins but suppresses expression of regulatory proteins.  
619 *EMBO J.* **7**, 519-523 (1988).
- 620 19. Mertz, J. A., Simper, M. S., Lozano, M. M., Payne, S. M. & Dudley, J. P. Mouse mammary  
621 tumor virus encodes a self-regulatory RNA export protein and is a complex retrovirus. *J. Virol.*  
622 **79**, 14737-14747 (2005).
- 623 20. Magin, C., Lower, R. & Lower, J. cORF and RcRE, the Rev/Rex and RRE/RxRE  
624 homologues of the human endogenous retrovirus family HTDV/HERV-K. *J. Virol.* **73**, 9496-9507  
625 (1999).
- 626 21. Magin-Lachmann, C. *et al.* Rec (formerly Corf) function requires interaction with a complex,  
627 folded RNA structure within its responsive element rather than binding to a discrete specific  
628 binding site. *J. Virol.* **75**, 10359-10371 (2001).
- 629 22. Smyth, R. P., Davenport, M. P. & Mak, J. The origin of genetic diversity in HIV-1. *Virus Res.*  
630 **169**, 415-429 (2012).
- 631 23. Jackson, P. E., Tebit, D. M., Rekosh, D. & Hammarskjold, M. Rev–RRE Functional Activity  
632 Differs Substantially Among Primary HIV-1 Isolates. *AIDS Res. Hum. Retroviruses* (2016).
- 633 24. Sloan, E. A. *et al.* Limited nucleotide changes in the Rev response element (RRE) during  
634 HIV-1 infection alter overall Rev-RRE activity and Rev multimerization. *J. Virol.* **87**, 11173-  
635 11186 (2013).
- 636 25. Sherpa, C. *et al.* Evolution of the HIV-1 RRE during natural infection reveals key nucleotide  
637 changes that correlate with altered structure and increased activity over time. *bioRxiv*, 483511  
638 (2018).
- 639 26. Phuphuakrat, A. & Auewarakul, P. Functional variability of Rev response element in HIV-1  
640 primary isolates. *Virus Genes* **30**, 23-29 (2005).
- 641 27. Phuphuakrat, A., Paris, R. M., Nittayaphan, S., Louisirochanakul, S. & Auewarakul, P.  
642 Functional variation of HIV-1 Rev response element in a longitudinally studied cohort. *J. Med.*  
643 *Virol.* **75**, 367-373 (2005).
- 644 28. Hua, J., Caffrey, J. J. & Cullen, B. R. Functional consequences of natural sequence  
645 variation in the activation domain of HIV-1 Rev. *Virology* **222**, 423-429 (1996).

- 646 29. Bobbitt, K. R. *et al.* Rev activity determines sensitivity of HIV-1-infected primary T cells to  
647 CTL killing. *Immunity* **18**, 289-299 (2003).
- 648 30. Belshan, M. *et al.* Genetic and biological variation in equine infectious anemia virus Rev  
649 correlates with variable stages of clinical disease in an experimentally infected pony. *Virology*  
650 **279**, 185-200 (2001).
- 651 31. Daelemans, D. *et al.* A synthetic HIV-1 Rev inhibitor interfering with the CRM1-mediated  
652 nuclear export. *Proc. Natl. Acad. Sci. U. S. A.* **99**, 14440-14445 (2002).
- 653 32. Hope, T. J., Huang, X. J., McDonald, D. & Parslow, T. G. Steroid-receptor fusion of the  
654 human immunodeficiency virus type 1 Rev transactivator: mapping cryptic functions of the  
655 arginine-rich motif. *Proc. Natl. Acad. Sci. U. S. A.* **87**, 7787-7791 (1990).
- 656 33. Wu, Y., Beddall, M. H. & Marsh, J. W. Rev-dependent indicator T cell line. *Curr. HIV. Res.* **5**,  
657 394-402 (2007).
- 658 34. Adachi, A. *et al.* Production of acquired immunodeficiency syndrome-associated retrovirus in  
659 human and nonhuman cells transfected with an infectious molecular clone. *J. Virol.* **59**, 284-291  
660 (1986).
- 661 35. Kim, J. H. *et al.* High cleavage efficiency of a 2A peptide derived from porcine teschovirus-1  
662 in human cell lines, zebrafish and mice. *PLoS one* **6**, e18556 (2011).
- 663 36. Jin, L., Guzik, B. W., Bor, Y. C., Rekosh, D. & Hammarskjold, M. L. Tap and NXT promote  
664 translation of unspliced mRNA. *Genes Dev.* **17**, 3075-3086 (2003).
- 665 37. Yang, J. *et al.* An ancient family of human endogenous retroviruses encodes a functional  
666 homolog of the HIV-1 Rev protein. *Proc. Natl. Acad. Sci. U. S. A.* **96**, 13404-13408 (1999).
- 667 38. Mayer, J. *et al.* Human endogenous retrovirus HERV-K (HML-2) proviruses with Rec protein  
668 coding capacity and transcriptional activity. *Virology* **322**, 190-198 (2004).
- 669 39. Heguy, A. Inhibition of the HIV Rev transactivator : a new target for therapeutic intervention.  
670 *Front. Biosci.* **2**, d283-97 (1997).
- 671 40. Shuck-Lee, D. *et al.* Heterocyclic compounds that inhibit Rev-RRE function and human  
672 immunodeficiency virus type 1 replication. *Antimicrob. Agents Chemother.* **52**, 3169-3179  
673 (2008).
- 674 41. Nakamura, R. L. *et al.* Identification and Optimization of Thienopyridine Carboxamides as  
675 Inhibitors of HIV Regulatory Complexes. *Antimicrob. Agents Chemother.* **61**,  
676 10.1128/AAC.02366-16. Print 2017 Jul (2017).
- 677 42. Malim, M. H., Böhnlein, S., Hauber, J. & Cullen, B. R. Functional dissection of the HIV-1 Rev  
678 trans-activator—derivation of a trans-dominant repressor of Rev function. *Cell* **58**, 205-214  
679 (1989).

- 680 43. Iacampo, S. & Cochrane, A. Human immunodeficiency virus type 1 Rev function requires  
681 continued synthesis of its target mRNA. *J. Virol.* **70**, 8332-8339 (1996).
- 682 44. Viphakone, N. *et al.* TRESX exposes the RNA-binding domain of Nxf1 to enable mRNA  
683 export. *Nature communications* **3**, 1006 (2012).
- 684 45. Jayaraman, B., Fernandes, J., Yang, S., Smith, C. & Frankel, A. D. Highly Mutable Linker  
685 Regions Regulate HIV-1 Rev Function and Stability. *bioRxiv*, 424259 (2018).
- 686 46. Salminen, M. O. *et al.* Recovery of virtually full-length HIV-1 provirus of diverse subtypes  
687 from primary virus cultures using the polymerase chain reaction. *Virology* **213**, 80-86 (1995).
- 688 47. Zhang, G., Gurtu, V. & Kain, S. R. An enhanced green fluorescent protein allows sensitive  
689 detection of gene transfer in mammalian cells. *Biochem. Biophys. Res. Commun.* **227**, 707-711  
690 (1996).
- 691 48. Shaner, N. C. *et al.* Improved monomeric red, orange and yellow fluorescent proteins  
692 derived from *Discosoma* sp. red fluorescent protein. *Nat. Biotechnol.* **22**, 1567 (2004).
- 693 49. Subach, O. M. *et al.* Conversion of red fluorescent protein into a bright blue probe. *Chem.*  
694 *Biol.* **15**, 1116-1124 (2008).
- 695 50. Bryant, M. & Ratner, L. Myristoylation-dependent replication and assembly of human  
696 immunodeficiency virus 1. *Proc. Natl. Acad. Sci. U. S. A.* **87**, 523-527 (1990).
- 697 51. Wehrly, K. & Chesebro, B. p24 antigen capture assay for quantification of human  
698 immunodeficiency virus using readily available inexpensive reagents. *Methods* **12**, 288-293  
699 (1997).
- 700 52. Boussif, O. *et al.* A versatile vector for gene and oligonucleotide transfer into cells in culture  
701 and in vivo: polyethylenimine. *Proc. Natl. Acad. Sci. U. S. A.* **92**, 7297-7301 (1995).
- 702 53. Sherpa, C., Rausch, J. W., Le Grice, S. F., Hammarskjold, M. L. & Rekosh, D. The HIV-1  
703 Rev response element (RRE) adopts alternative conformations that promote different rates of  
704 virus replication. *Nucleic Acids Res.* **43**, 4676-4686 (2015).
- 705 54. Yamaguchi, J. *et al.* HIV type 1 group M subtype G in Cameroon: five genome sequences.  
706 *AIDS Res. Hum. Retroviruses* **25**, 469-473 (2009).
- 707 55. Sanchez, A. M. *et al.* Development of a contemporary globally diverse HIV viral panel by the  
708 EQAPOL program. *J. Immunol. Methods* **409**, 117-130 (2014).
- 709 56. Soneoka, Y. *et al.* A transient three-plasmid expression system for the production of high  
710 titer retroviral vectors. *Nucleic Acids Res.* **23**, 628-633 (1995).
- 711 57. Foley, G. E. *et al.* Continuous culture of human lymphoblasts from peripheral blood of a  
712 child with acute leukemia. *Cancer* **18**, 522-529 (1965).

713 58. Nara, P. *et al.* Simple, rapid, quantitative, syncytium-forming microassay for the detection of  
714 human immunodeficiency virus neutralizing antibody. *AIDS Res. Hum. Retroviruses* **3**, 283-302  
715 (1987).

716 59. Chun, T. *et al.* In vivo fate of HIV-1-infected T cells: quantitative analysis of the transition to  
717 stable latency. *Nat. Med.* **1**, 1284 (1995).

718

## 719 **Acknowledgements.**

720 The pMSCV-IRES-mCherry and pMSCV-IRES-TagBFP vectors were gifts from Dario  
721 Vignali obtained through Addgene (unpublished). The plasmids psPAX2 and pMD2.G were gifts  
722 from Didier Trono obtained through Addgene. Technical assistance and guidance on data  
723 interpretation was provided by the University of Virginia Flow Cytometry Core Facility. The p24  
724 hybridoma (183-H12-5C) (Cat# 1513) was obtained through the NIH AIDS Reagent Program,  
725 Division of AIDS, NIAID, NIH from Dr. Bruce Chesebro. This work was supported by grants GM  
726 110009, CA206275, AI134208, AI087505 and AI068501 from the National Institutes of Health  
727 (NIH) to M.-L.H and D.R. P. E. H. J. was supported by grant K08AI136671 from the National  
728 Institutes of Health. Salary support for M.-L.H. and D.R. was provided by the Charles H. Ross,  
729 Jr., and Myles H. Thaler Endowments at the University of Virginia.

730

731

## 732 **Author Contributions.**

733 P. E. H. J wrote the first draft of the manuscript text, prepared all figures, and performed  
734 many of the experiments. M. S. and S. R. performed the experiments relating to HERV-K Rec  
735 and the RcRE. J. H. was involved in the development of the two color vector and performed  
736 many of the initial experiments not reported here to characterize the system, as well as some of  
737 the experiments reported here. D. R. and M.-L. H. conceptualized the assay system, contributed  
738 to study design, manuscript revisions, and project oversight. All authors reviewed the  
739 manuscript.

740

741 **Competing Interests.**

742 The authors declare no competing interests.

743

744 **Tables and Figures.**

745

746 Figure 1. Schematic of retroviral vector constructs used in this study. The two-color constructs  
747 (left boxes) are based on the HIV NL4-3 genome with the following modifications from left to  
748 right: mutation of the myristoylation signal in *gag*, truncation of *gag*, addition of a CHYSEL  
749 sequence and an *eGFP* gene in the *gag* reading frame, deletion of the frameshifting site,  
750 missense mutation of the *rev* start codon, insertion of a stop codon in the first exon of *rev*,  
751 introduction of a frameshift mutation in *env*, placement of an XmaI and an XbaI site flanking the  
752 RRE within *env*, and deletion of the beginning of *nef* with the substitution of a second  
753 fluorescent protein in this position. The single-color constructs (right boxes) are MSCV vectors  
754 modified with a *rev* gene flanked by two restriction enzyme sites as well as an in-frame IRES  
755 and a fluorescent protein gene. Two construct sets were used in this study. (a) Construct set A  
756 has an eGFP in the *gag* reading frame, mCherry in the *nef* reading frame, and TagBFP in the  
757 Rev vector. (b) Construct set B has an eGFP in the *gag* reading frame, TagBFP in the *nef*  
758 reading frame, and mCherry in the Rev vector. Myr = myristoylation site, CHYSEL = cis-acting  
759 hydrolase element, f.s. = frameshift site, LTR = long terminal repeat, GFP = green fluorescent  
760 protein, BFP = blue fluorescent protein, RFP = red fluorescent protein, MSCV = murine stem  
761 cell virus, IRES = internal ribosomal entry site,  $\psi$  = packaging signal.

762

763 Figure 2. Assay gating strategies. The top panels (A) show untransfected cells. The bottom  
764 panels (B) show cells transfected with the vector constructs shown in Figure 1B. 293T/17 cells

765 for analysis were identified by gating first on a forward-scatter versus side-scatter plot (a)  
766 followed by an additional gate for single cells constructed on a forward-scatter area versus  
767 forward-scatter height plot (b). The fluorescence intensity (eGFP versus TagBFP) of each  
768 individual cell is displayed, representing the two markers carried on the HIV-derived construct.  
769 (c). Untransfected cells were used to define the double-negative population which was excluded  
770 from further analysis. Cells which expressed the HIV-derived construct (i.e. Q1, Q2 and Q3 -  
771 eGFP-positive or TagBFP-positive or both) were used for analysis. In other experiments utilizing  
772 the MSCV-derived construct carrying a third fluorescent marker, an alternative analysis could be  
773 used. In addition to gating on single cells expressing the HIV-derived construct, a gate was  
774 created including cells expressing the MSCV-derived construct as well (i.e. mCherry positive)  
775 (d). Finally, the population of cells expressing both the HIV-derived construct (i.e. Q1, Q2, or Q3  
776 from c) and the MSCV-derived construct (i.e. mCherry positive from d) was used for analysis  
777 (e). Red boxes denote gates used for calculation of functional activity.

778  
779 Figure 3. Response of the two color reporter vector to increasing amounts of Rev plasmid. 1000  
780 ng of an eGFP-mCherry (a) or eGFP-TagBFP (b) HIV-derived construct was transfected into  
781  $8 \times 10^5$  293T/17 cells along with a variable amount of CMV-Rev plasmid. Single cells were plotted  
782 with Rev-dependent eGFP signal coming from the unspliced mRNA along the y-axis and the  
783 Rev-independent signal coming from the fully spliced mRNA along the x-axis (mCherry in a and  
784 TagBFP in b). The amount of Rev plasmid transfected along with the two-color construct is  
785 listed below each plot. The proportion of the total cells in each plot is shown for every quadrant.  
786 Each plot represents at least 100,000 cells (range 107,549 to 119,937 cells). (c) For each  
787 construct, the ratio of Rev-dependent (eGFP) to Rev-independent (mCherry or TagBFP) signal  
788 MFI was calculated for each experimental condition as a measure of Rev-RRE functional  
789 activity (see gating strategy in Figure 2 panel c). The activity in the 100 ng condition for each

790 construct was set as 100. N=2, vertical error bars represent SEM, which are too small to be  
791 seen in this figure.

792

793 Figure 4. Differential activity of RRE and Rev sequences. (a) Three different 234-nt RREs were  
794 cloned into the eGFP/TagBFP HIV-derived construct, including RREs from NL4-3 and two  
795 derived from patient isolates (SC3-M0A and SC3-M57A)<sup>24</sup>. 1000 ng of the HIV-derived construct  
796 was transfected into  $8 \times 10^5$  293T/17 cells along with 0, 25, 50, or 100 ng of pCMV-SC3-(M0-  
797 B/M57-A) Rev<sup>24</sup>. Twenty-four hours after transfection, flow cytometry was performed and the  
798 ratio of eGFP/TagBFP signal was determined as a measure of Rev-RRE functional activity. The  
799 maximum measured activity was set as 100. (b) Three Rev sequences from NL4-3 or two  
800 different primary isolates<sup>54, 55</sup> were cloned into the MSCV vector carrying an mCherry  
801 fluorescent marker. 1000 ng of an eGFP/TagBFP HIV-derived construct containing an NL4-3  
802 RRE sequence was transfected into  $8 \times 10^5$  293T/17 cells along with 12.5, 25, 50, 100, or 200 ng  
803 of a pMSCV-Rev-IRES-mCherry construct. Flow cytometry was performed 24 hours after  
804 transfection and the data were analyzed as above. N=2, bars, which are too small to be seen in  
805 this figure, represent SEM for both graphs.

806

807 Figure 5. Activity measurements of heterologous viral and cellular RNA export elements in the  
808 HIV-derived reporter construct. The eGFP-mCherry HIV-derived construct was modified to carry  
809 a variety of RNA transporting elements (or no element) instead of the RRE seen in Figure 1.  
810 The modified vectors were then transfected into 293T cells and eGFP and mCherry  
811 fluorescence was measured. (a). An HIV-derived construct containing an MPMV CTE was  
812 tested along with a construct containing no element. The activity of the MPMV CTE construct  
813 was set as 100 and the other values were normalized accordingly. \* represents  $P < 0.05$ , N=3,  
814 bars represent SEM. (b). HIV-derived constructs containing either one or two copies of the CTE

815 from *NXF1* intron 10 were tested along with a construct containing no element. Activity of the  
816 dual *NXF1* CTE construct was set as 100 and the other values were normalized accordingly. In  
817 both (a) and (b), *Nxf1* and *Nxt1* were co-expressed plasmids under the control of the CMV-IE  
818 promoter. \* represents  $P < 0.05$ ,  $N = 2$ , bars represent SEM. (c) HIV-derived constructs containing  
819 single or dual HERV-K RcRE elements or an NL4-3 RRE were co-transfected together with  
820 either 0, 50, 100, 200, or 400 ng CMV-Rec plasmid. The activity of the dual RcRE construct in  
821 the 400 ng CMV-Rec condition was set as 100 and the other values were normalized  
822 accordingly. (d) In a separate experiment, HIV-derived constructs containing single or dual  
823 HERV-K RcRE elements were transfected along with 200 ng CMV-Rec plasmid. The activity of  
824 the dual RcRE construct was set as 100 and the other values normalized accordingly. \*  
825 represents  $P < 0.05$ ,  $N = 2$ , bars represent SEM. GFP = green fluorescent protein, MPMV =  
826 Mason-Pfizer monkey virus, CTE = constitutive transport element, RcRE = Rec Response  
827 Element from HERV-K.

828

829 Figure 6. The effect of inhibitors of Rev function on fluorescent protein expression from the  
830 reporter vectors. (a) Compound 103833 decreases Rev-RRE functional activity in a dose  
831 dependent manner but does not affect CTE function. Two vector constructs were tested in the  
832 presence of compound 103833, a Rev-pathway small molecule inhibitor. The RRE construct  
833 was identical to that in Figure 1a. The CTE construct was created by replacing the RRE with an  
834 MPMV CTE. The constructs were transfected into 293T/17 cells with Rev (RRE construct) or  
835 *Nxf1* and *Nxt1* (CTE construct). Cells were pre-treated with the indicated concentrations of  
836 103833 for 24 hours before transfection and remained in the medium until 24 hours after  
837 transfection when the cells were harvested for analysis. Both eGFP and mCherry signals were  
838 quantified for both constructs. The MFI for each fluorescent signal in the absence of inhibitor  
839 was set as 100 and the other values were normalized accordingly. (b) *Trans*-dominant negative  
840 Rev M10 inhibits Rev-RRE functional activity in a dose dependent manner.  $4 \times 10^5$  293T/17 cells



841 were transfected with 1000 ng of an eGFP-TagBFP HIV-derived vector along with 75 ng of  
842 pMSCV-Rev-IRES-mCherry vector (see Figure 1B). Additionally, a variable mass of a plasmid  
843 expressing *trans*-dominant negative Rev-M10 plasmid (pCMV-TD-Rev) was transfected into the  
844 system along with an empty vector to equalize total DNA mass of the pCMV plasmids to a total  
845 of 600 ng. The MFI of the Rev-dependent (eGFP), Rev-independent (TagBFP), and Rev-linked  
846 (mCherry) signals was determined for each ratio of Rev plasmid to Rev-M10 plasmid. For each  
847 fluorescent protein, the MFI in the absence of Rev-M10 was set at 100 and the other values  
848 were normalized accordingly. N=2, bars, which are too small to be seen in this figure, represent  
849 SEM for both graphs. MFI = arithmetic mean fluorescence intensity.

850

851 Figure 7. Measurement of Rev-RRE functional activity from an integrated chromatin associated  
852 provirus. HIV- and MSCV-derived constructs as in Figure 1 b were packaged and VSV-G  
853 pseudotyped in 293T/17 cells. A single HIV-derived construct with an NL4-3 RRE was used  
854 along with three MSCV constructs with 9-G, 8-G, or NL4-3 Rev sequences. CEM-SS cells were  
855 transduced with both the HIV-derived construct and one of the MSCV-derived constructs at a  
856 multiplicity of infection of 0.5. After 72 hours, fluorescence was measured via flow cytometry and  
857 gating for analysis was performed as in Figure 2 e (i.e. analyzed cells fluoresce with mCherry,  
858 and with eGFP and/or TagBFP). To generate dot plots, single cells were plotted with Rev-  
859 dependent eGFP signal along the y-axis and the Rev-independent TagBFP signal along the x-  
860 axis with the (a) NL4-3 Rev, (b) 8-G Rev, and (c) 9-G Rev. Flow cytometry plots represent all  
861 mCherry-positive single cells measured in three experimental replicates prior to analysis gating.  
862 Plot (a) shows 5,690 cells, (b) shows 12,734 cells, and (c) shows 8,534 cells. (D) Relative Rev-  
863 RRE functional activity was calculated for each Rev construct as the ratio of eGFP:TagBFP MFI  
864 in the set of cells expressing fluorescent markers from both transducing constructs. The 9-G  
865 Rev activity was set as 100 and the other values were normalized accordingly. N=3, bars  
866 represent SEM.

867

868 Figure 8. Induction of eGFP expression from a CEM-SS cell line containing a stably integrated  
869 single copy of the reporter plasmid. CEM-SS cells were transduced with an eGFP-mCherry HIV-  
870 derived construct and a clonal cell line was created by limiting dilution. Thus, almost all cells  
871 show a uniformity of mCherry expression (Plot a-left). The cell line was subsequently  
872 transduced by a pMSCV-Rev-IRES-TagBFP and fluorescence was measured for all three  
873 markers. Untransduced cells are shown on the left, cells transduced with the MSCV-derived  
874 Rev/BFP expressing vector are shown on the right. Plot a (right) shows that transduction  
875 caused about 8.27% of the cells to express TagBFP. Plot b (right) shows that transduction  
876 caused about 8.79% of the cells to express eGFP. Plot c (right) shows that there is a linear  
877 relationship between the BFP and eGFP signal, indicating a strong correlation between Rev  
878 levels in a cell (BFP) and expression of the unspliced mRNA isoform (eGFP).

879

880

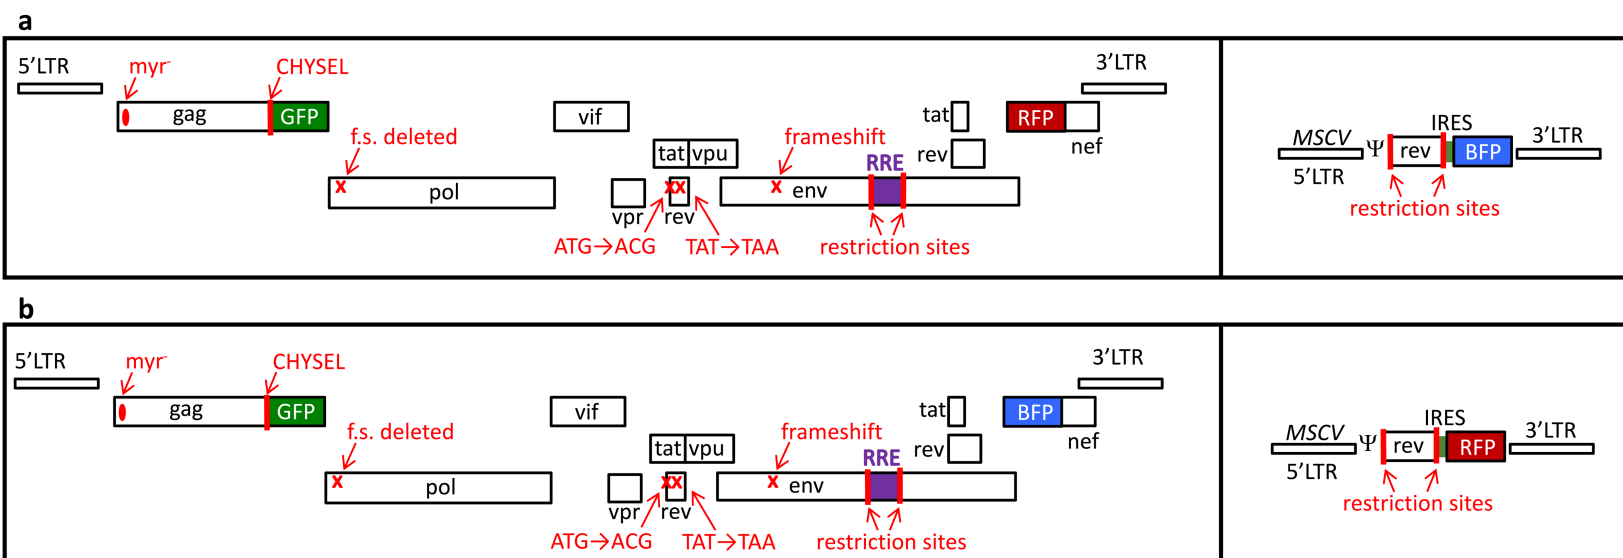

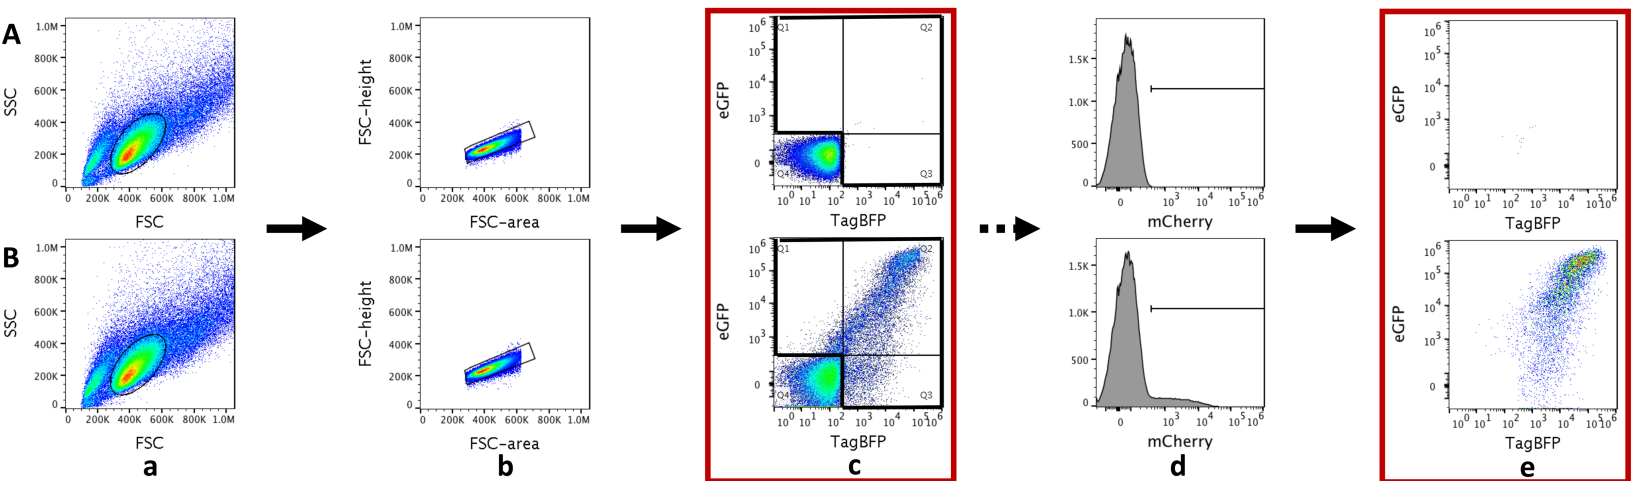

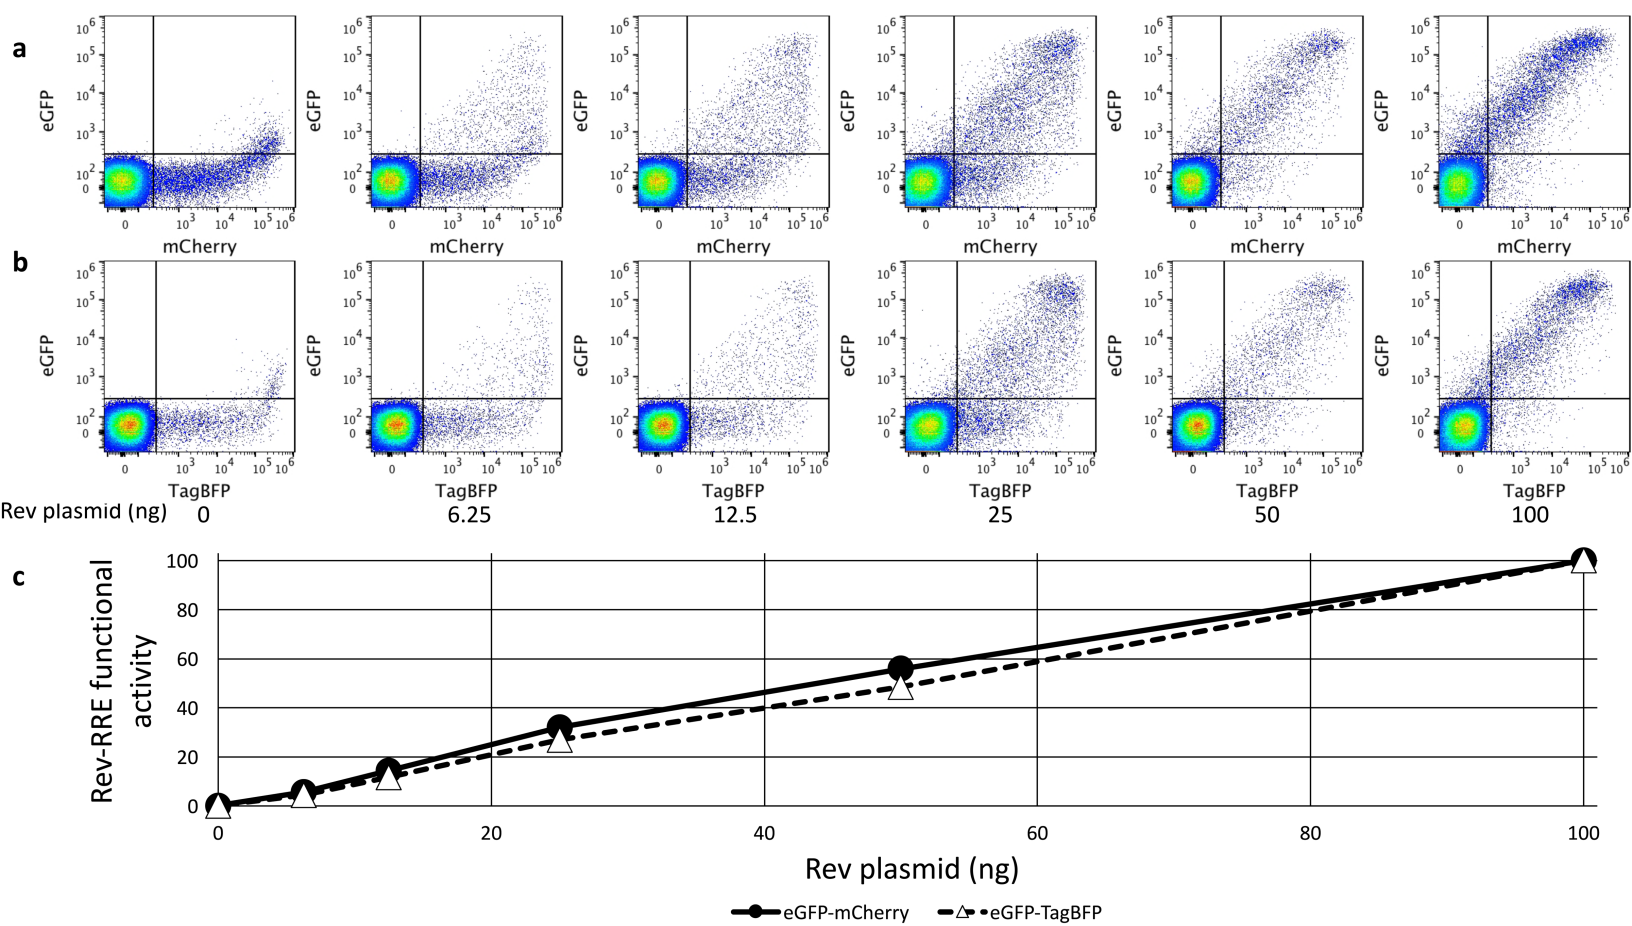

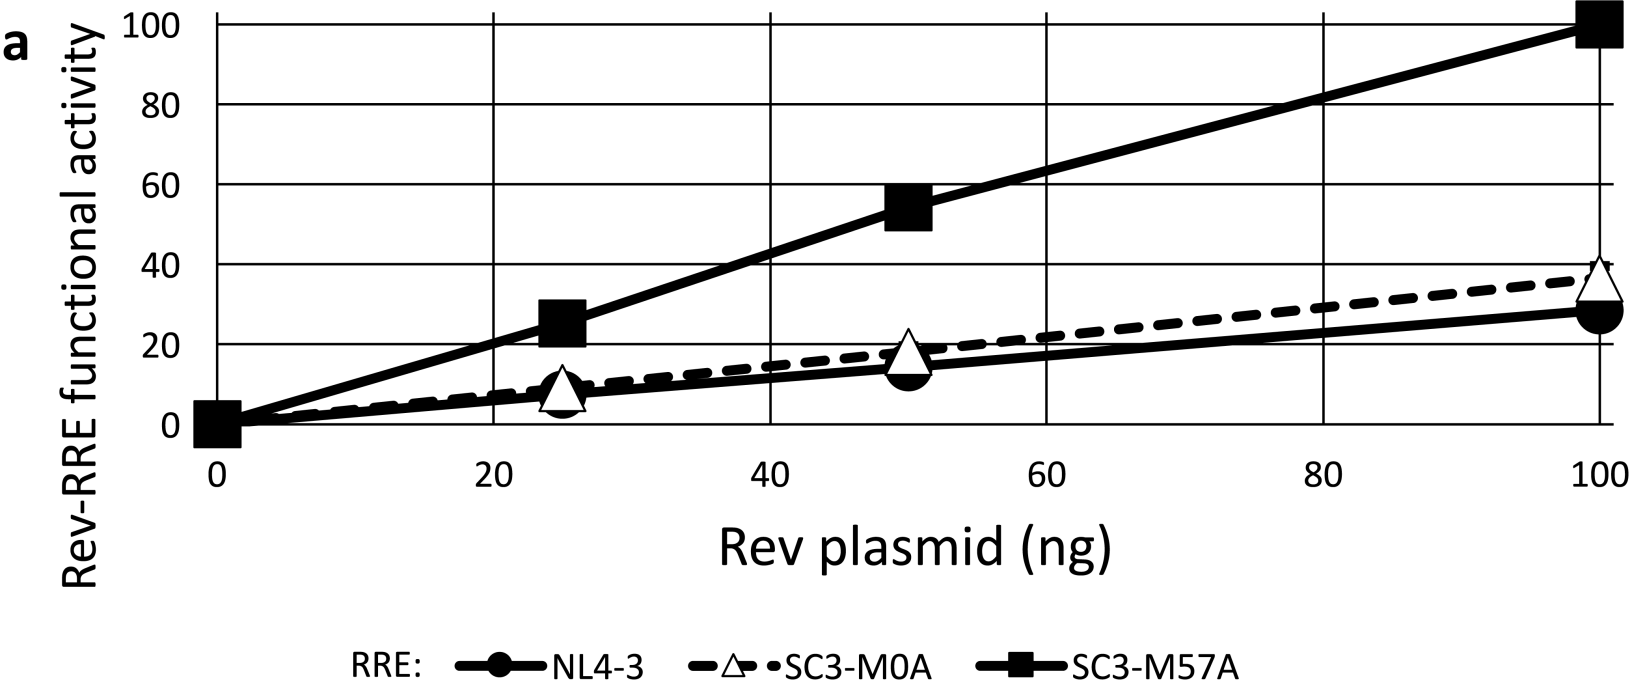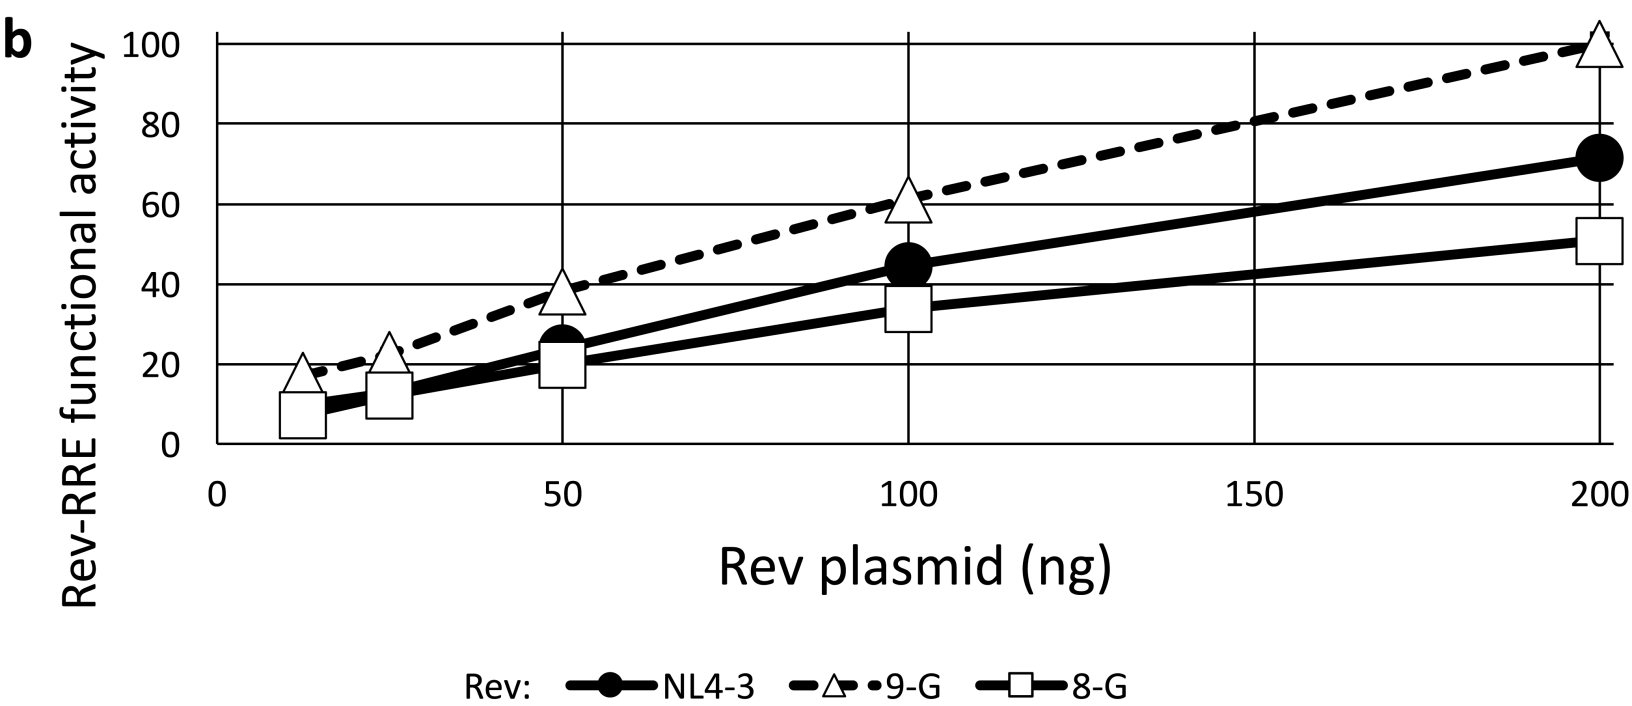

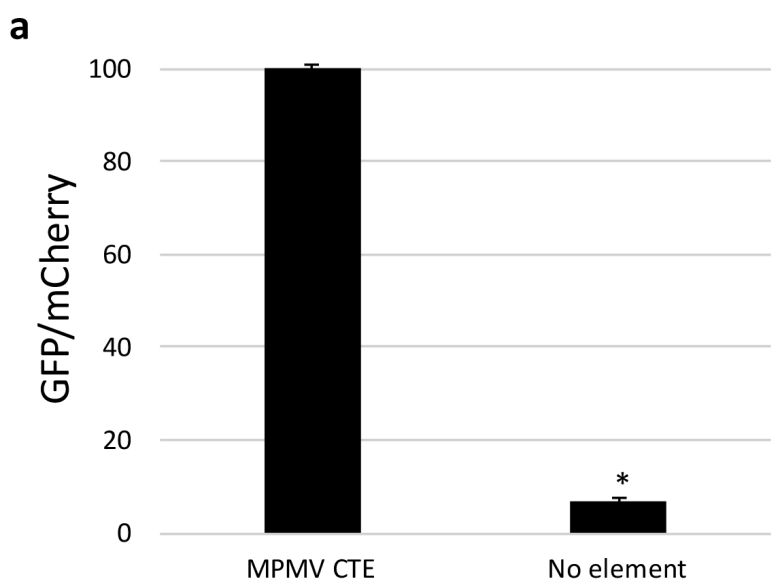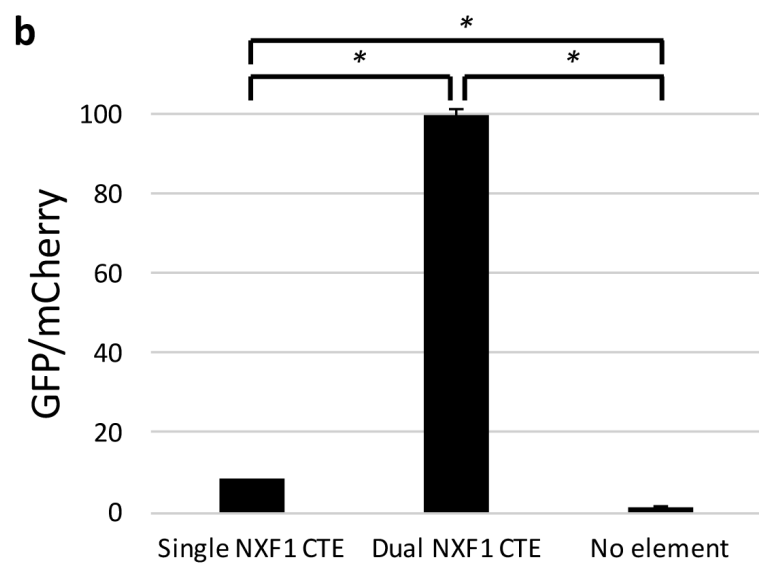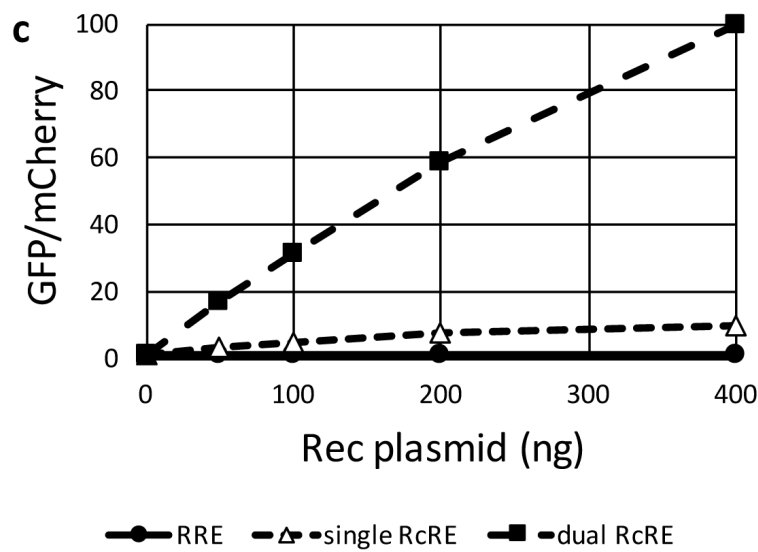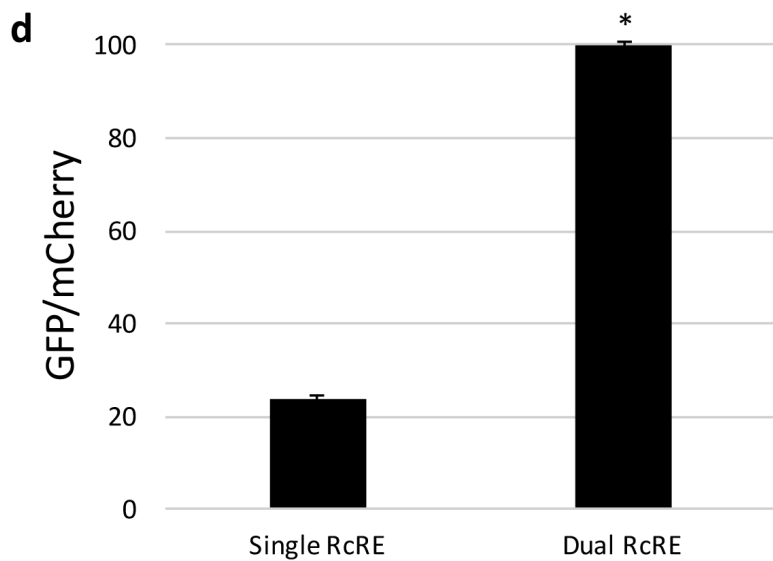

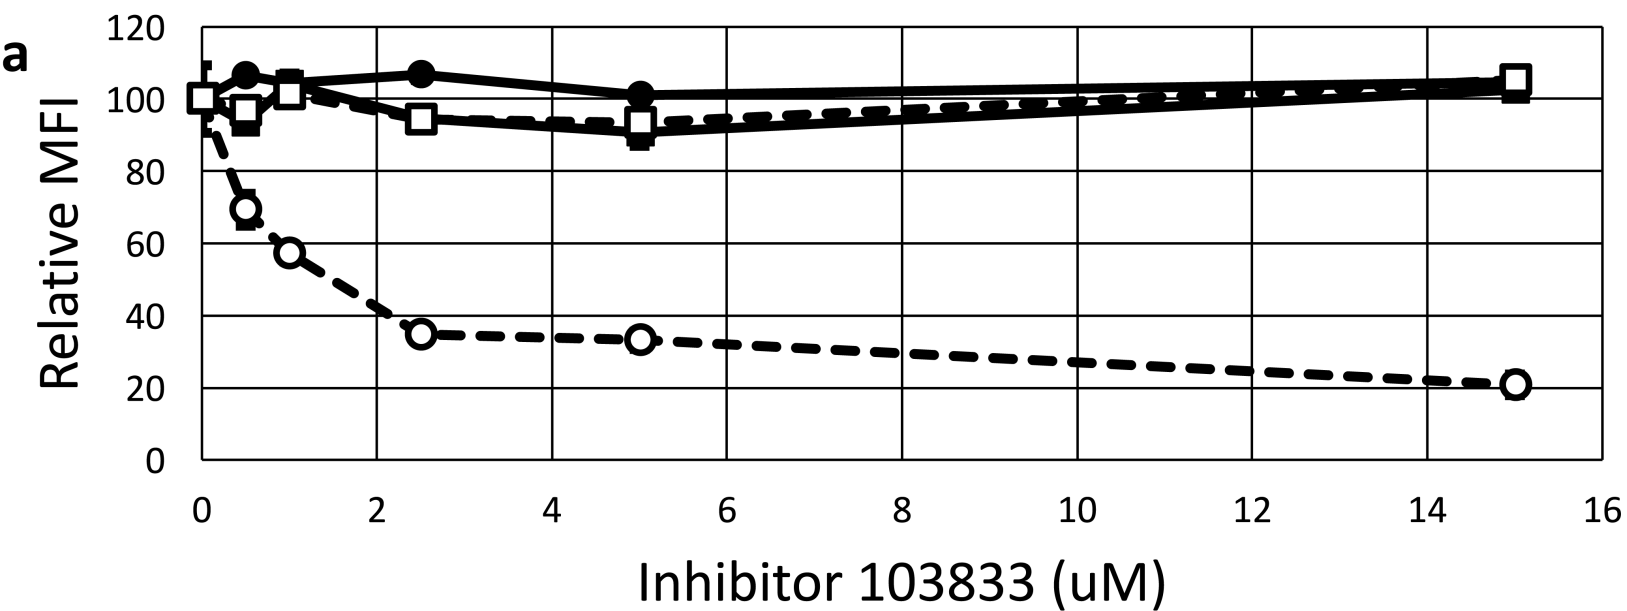

● eGFP from CTE construct    ■ mCherry from CTE construct  
○ eGFP from RRE construct    □ mCherry from RRE construct

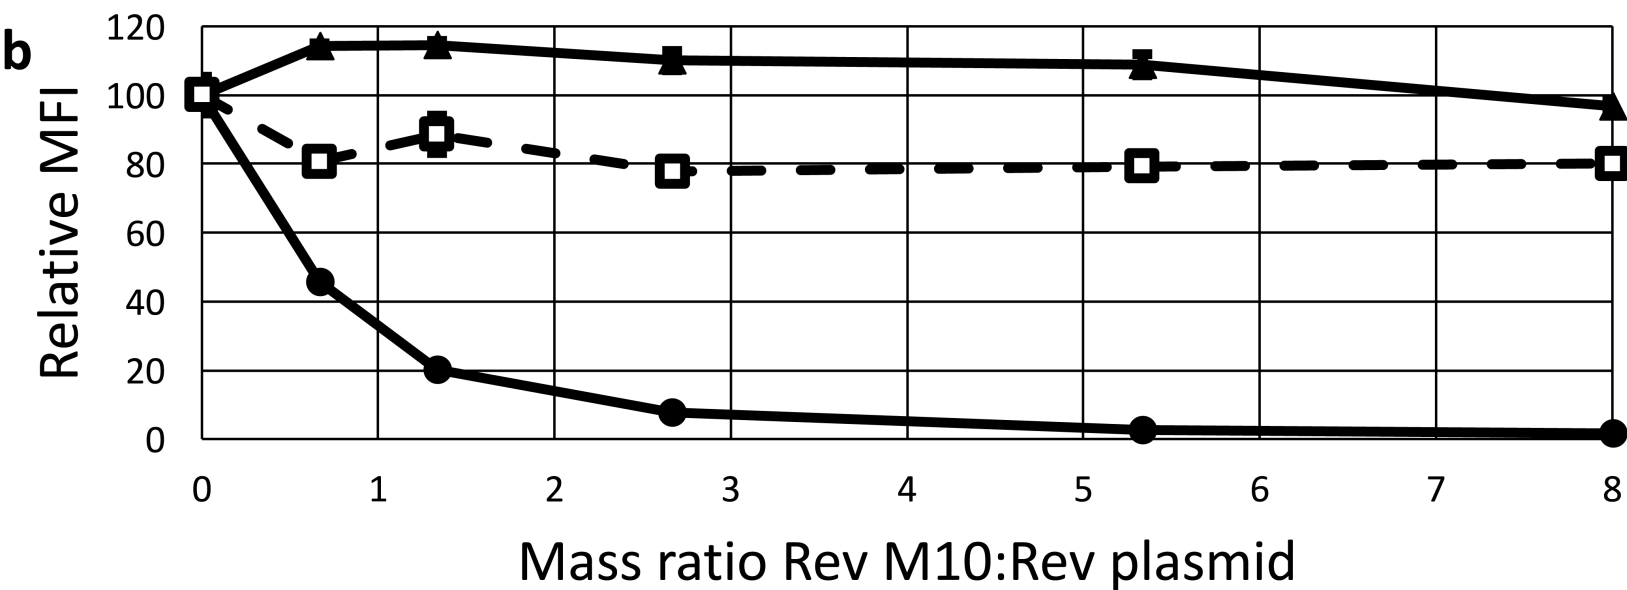

● GFP    ▲ BFP    □ mCherry



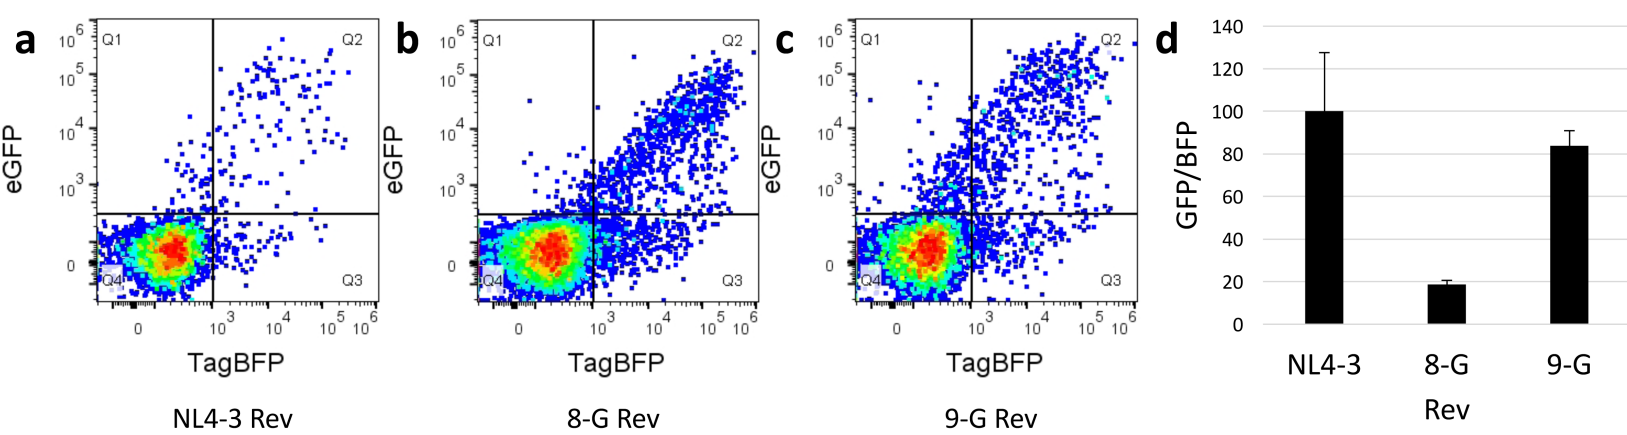

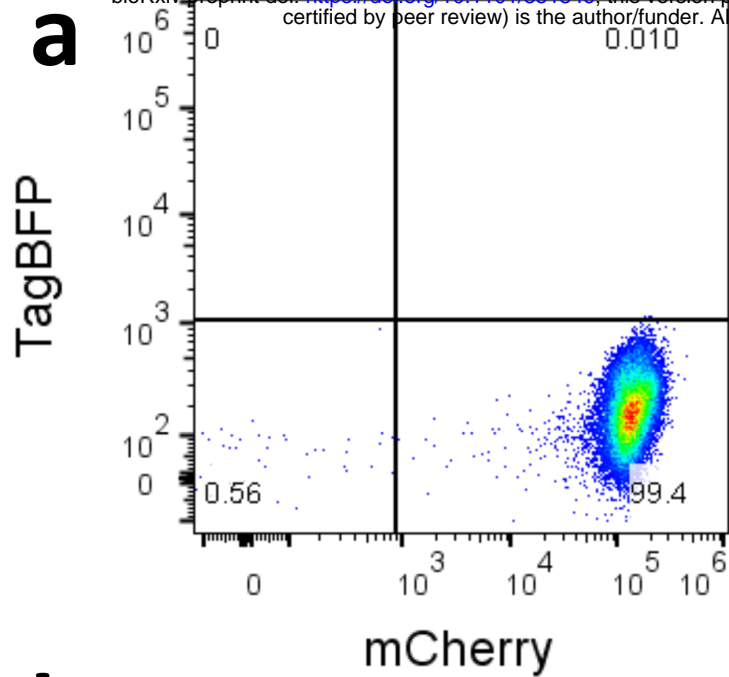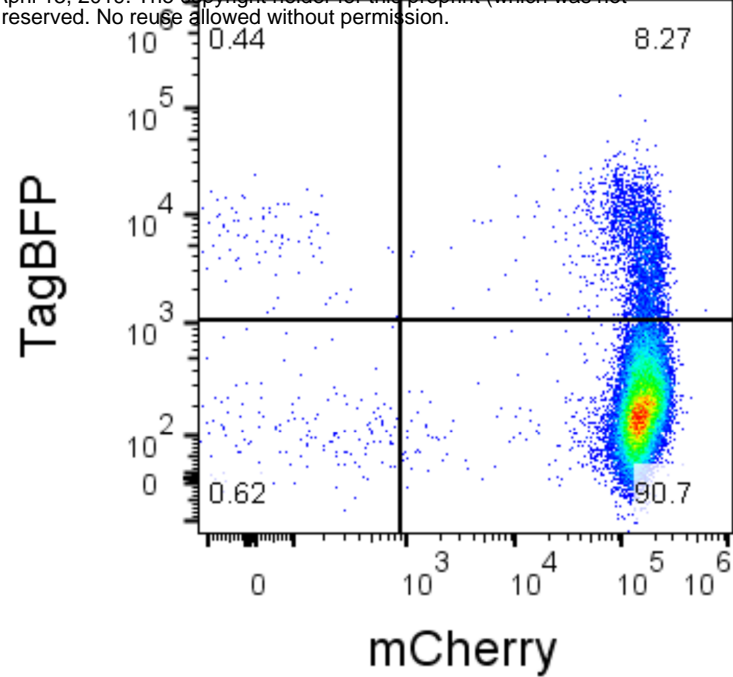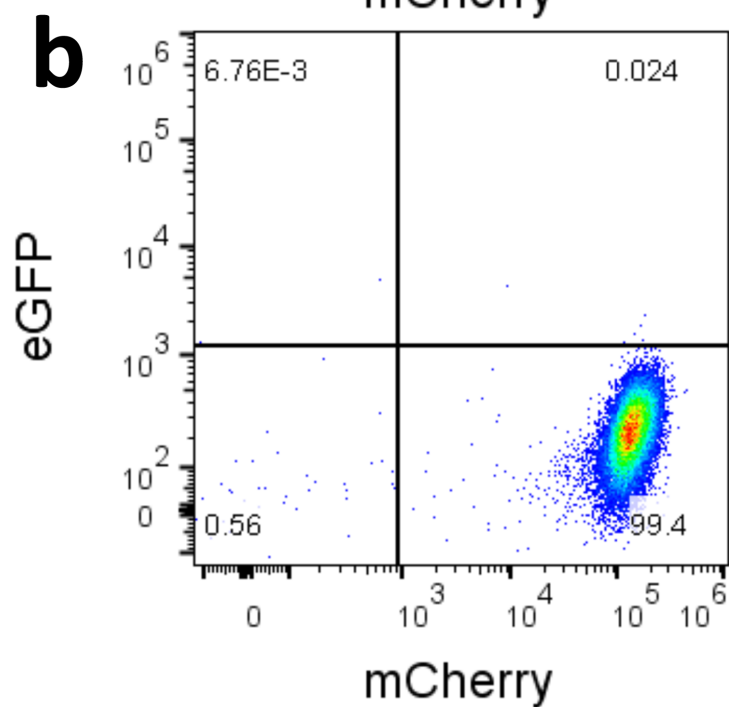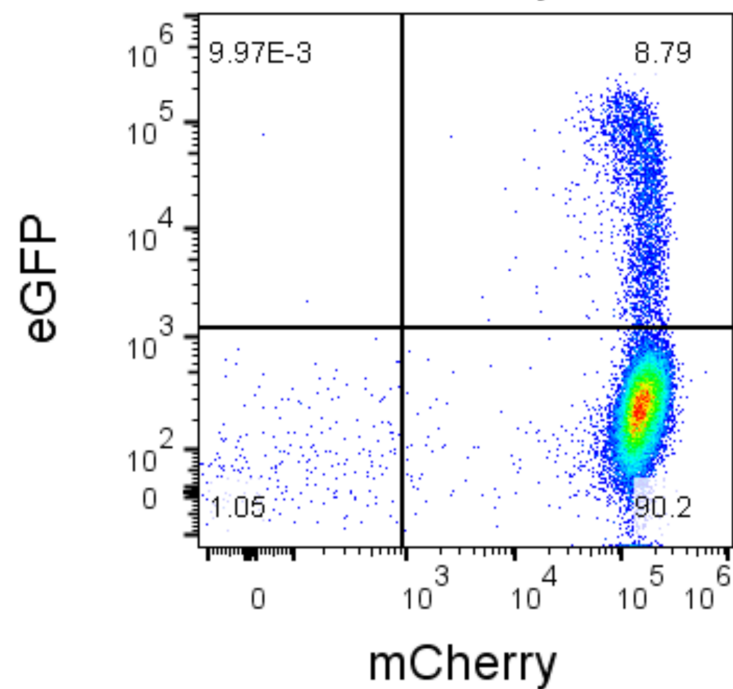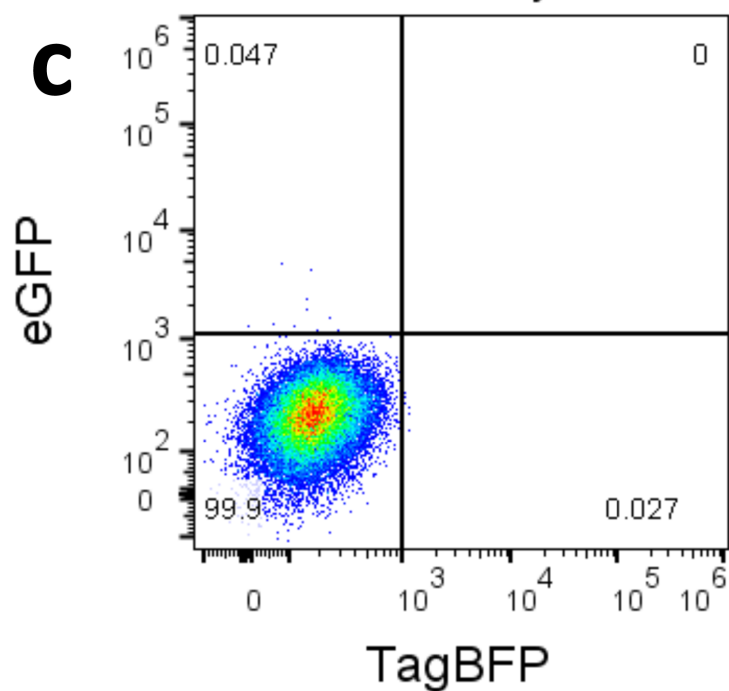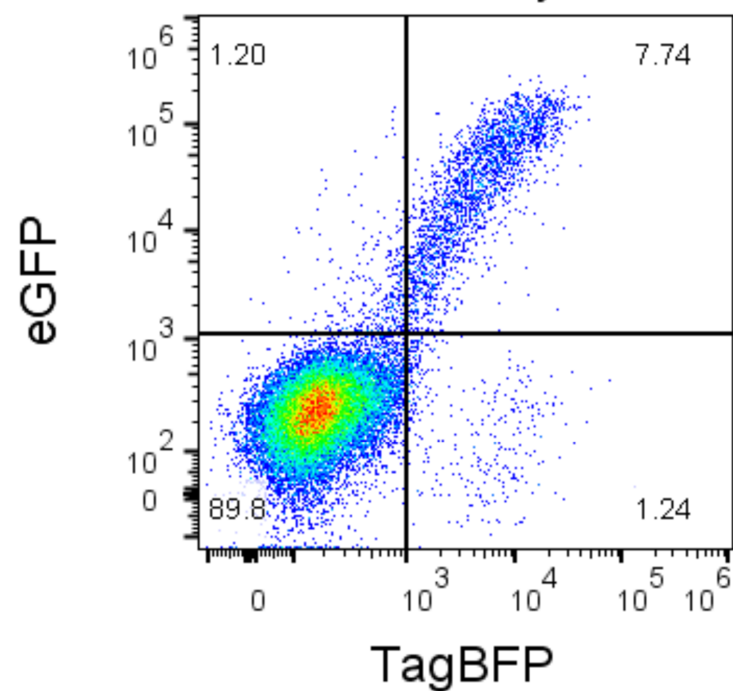

Source: https://www.biorxiv.org/content/10.1101/551846v3.full.pdf
